1 **Lewis rat NLRP1 inflammasome activation is mediated by three**  
2 ***Toxoplasma gondii* dense granule proteins**

3

4 Yifan Wang<sup>1</sup>, Kimberly M. Cirelli<sup>2,\*a</sup>, Patricio D.C. Barros<sup>1,\*b</sup>, Lamba Omar Sangaré<sup>1</sup>, Vincent  
5 Butty<sup>2</sup>, Musa A. Hassan<sup>3,4,5</sup>, Patricia Pesavento<sup>1</sup>, Asli Mete<sup>1</sup>, Jeroen P.J. Saeij<sup>1,#</sup>

6

7 <sup>1</sup> Department of Pathology, Microbiology and Immunology, School of Veterinary Medicine,  
8 University of California, Davis, Davis, California 95616, USA

9 <sup>2</sup> Department of Biology, Massachusetts Institute of Technology, Cambridge, Massachusetts  
10 02139, USA

11 <sup>3</sup> College of Medicine and Veterinary Medicine, The University of Edinburgh, Edinburgh, UK.

12 <sup>4</sup> The Roslin Institute, The University of Edinburgh, Edinburgh, UK.

13 <sup>5</sup> Center for Tropical Livestock Health and Genetics, The University of Edinburgh, Edinburgh,  
14 UK.

15 \*a Present address: Kimberly M. Cirelli, Division of Vaccine Discovery, La Jolla Institute for  
16 Allergy and Immunology, La Jolla, California 92037, USA

17 \*b Present address: Patricio D.C. Barros, Laboratory of Immunoparasitology “Dr. Mário Endsfieldz  
18 Camargo”, Department of Immunology, Institute of Biomedical Sciences, Federal University of  
19 Uberlândia, Uberlândia, Brazil

20

21 Running title: Three *Toxoplasma* GRAs activate the NLRP1 inflammasome

22 Y.W. and K.M.C. contributed equally to this work

23 Address correspondence to Jeroen P.J. Saeij, jsaeij@ucdavis.edu

24 **Abstract**

25       The Lewis rat is the only known warm-blooded animal that has sterile immunity to  
26 *Toxoplasma*. Upon invasion of Lewis rat macrophages *Toxoplasma* rapidly activates the  
27 nucleotide-binding oligomerization domain, leucine-rich repeat and pyrin domain containing 1  
28 (NLRP1) inflammasome resulting in interleukin (IL)-1 $\beta$  secretion and a form of cell death  
29 known as pyroptosis, which prevents *Toxoplasma* replication. Using a chemical mutagenesis  
30 screen we identified *Toxoplasma* mutants that no longer induced pyroptosis. Whole genome  
31 sequencing led to the identification of three *Toxoplasma* parasitophorous vacuole-localized dense  
32 granule proteins, GRA35, GRA42 and GRA43 that are individually required for inflammasome  
33 activation in Lewis rat macrophages. Macrophage infection with  $\Delta gra35$ ,  $\Delta gra42$ , and  $\Delta gra43$   
34 parasites leads to greatly reduced cell death and reduced IL-1 $\beta$  secretion. Lewis rat macrophage  
35 infected with parasites containing single, double or triple deletion of these GRAs showed similar  
36 levels of cell viability suggesting the three GRAs function in the same pathway that activates the  
37 inflammasome. Deletion of *GRA42* and *GRA43* resulted in *GRA35*, and other GRAs, being  
38 retained inside the parasitophorous vacuole instead of being localized to the parasitophorous  
39 vacuole membrane. *Toxoplasma* deficient in *GRA35*, *GRA42* or *GRA43* do not establish chronic  
40 infection in Lewis rats, but have reduced cyst number in parasite-susceptible F344 rats, in which  
41 *Toxoplasma* does not activate the NLRP1 inflammasome, revealing these GRAs determine  
42 parasite *in vivo* fitness independent of their role in inflammasome activation. Overall, our data  
43 suggest that *Toxoplasma* dense granule proteins that localize to the parasitophorous vacuole  
44 membrane are novel mediators of host NLRP1 inflammasome activation.

45

46 **Importance**

47           Inflammasomes are a major component of the innate immune system and responsible for  
48 detecting various microbial and environmental danger signals. The Lewis rat has sterile immunity to  
49 *Toxoplasma* because upon invasion of Lewis rat macrophages the parasite rapidly activates the  
50 NLRP1 inflammasome resulting in cell death and parasite elimination. The work reported here  
51 identified that *Toxoplasma* GRA35, GRA42 and GRA43 are required for activation of the Lewis rat  
52 NLRP1 inflammasome. GRA42 and GRA43 mediate the correct localization of other GRAs,  
53 including GRA35, to the parasitophorous vacuole membrane. In addition to their role in  
54 inflammasome activation, these three GRAs are also important for parasite *in vivo* fitness in a  
55 *Toxoplasma*-susceptible rat strain. Thus, these results give new insight into NLRP1 inflammasome  
56 activation by *Toxoplasma* effectors and identified three GRAs that are required for pathogenesis of  
57 the parasite.

58

## 59 **Introduction**

60 *Toxoplasma* is an obligate intracellular protozoan parasite that infects a wide variety of  
61 warm-blooded animals (1). Among its different hosts there are natural differences in  
62 susceptibility to the parasite. Most laboratory mouse strains are susceptible to infection and can  
63 succumb after low dose injection of virulent parasite strains. Rats and humans are relatively  
64 resistant to *Toxoplasma*. Most rat strains remain asymptomatic after infection, but the parasite  
65 establishes a chronic infection by developing into cysts in brain and muscle tissues. However, the  
66 Lewis rat strain can clear the parasite and fails to develop a chronic infection (2). This resistance  
67 was shown to be a myeloid cell-intrinsic dominant trait that mapped to a single locus, *Toxo1* (3).  
68 *In vitro*, resistance correlates with rapid induction of Lewis rat macrophage cell death after  
69 *Toxoplasma* invasion (4-6). *Toxoplasma*-induced Lewis macrophage cell death is controlled by  
70 *Nlrp1*, which encodes for the NLRP1 inflammasome sensor (4, 5).

71 The inflammasomes are a family of cytosolic pattern recognition receptors (PRRs).  
72 Activation of the sensor, leads to the formation of a multimeric complex and the recruitment and  
73 proteolytic activation of pro-caspase-1. Caspase-1 cleaves the cytokines pro-IL-1 $\beta$  and pro-IL-18  
74 resulting in their release from the cells. Caspase-1 activation also cleaves Gasdermin D  
75 (GSDMD) which can subsequently form pores in the host cell membrane and is therefore an  
76 essential trigger for a type of host cell death, termed pyroptosis (7, 8). Pyroptosis is a highly  
77 inflammatory form of programmed cell death that occurs most frequently upon infection with  
78 intracellular pathogens and has been established as a host mechanism to clear intracellular  
79 pathogens (9). *Toxoplasma* infection in Lewis rat bone marrow-derived macrophages (BMDMs)  
80 leads to NLRP1 inflammasome activation, which results in the release of IL-1 $\beta$  and IL-18 and  
81 pyroptosis of infected BMDMs, releasing parasites into the extracellular space before replication

82 can occur (4, 5). As macrophages are among the predominant cell type infected upon  
83 *Toxoplasma* infection (10), it is likely that macrophage pyroptosis is a host mechanism to  
84 prevent parasite proliferation inside the host. Furthermore, infected macrophages and dendritic  
85 cells are involved in promoting *Toxoplasma* dissemination by migrating to distant sites (11-13),  
86 and therefore *Toxoplasma*-induced pyroptosis of these cells could also inhibit *Toxoplasma*  
87 dissemination.

88 The specific stimuli that can activate the inflammasomes and their mechanism of  
89 activation vary. NLR family CARD domain-containing protein 4 (NLRC4) recognizes NLR  
90 family, apoptosis inhibitory protein (NAIP) proteins bound to bacterial components, namely  
91 flagellin and type III secretory system proteins (14). The NLRP3 inflammasome is activated by a  
92 large number of stimuli, such as low intracellular potassium concentrations (15), viruses e.g.  
93 influenza A (16), bacterial toxins e.g. nigericin and maitotoxin (17) and parasites e.g.  
94 *Plasmodium*-derived hemozoin (18). Anthrax Lethal Toxin (LT) is a protease and a direct  
95 activator of rat NLRP1 (19). LT cleaves the N-terminus of NLRP1 in LT-susceptible mouse and  
96 rat macrophages. This cleavage is sufficient to activate the NLRP1 inflammasome and induce  
97 pyroptosis (20). Inflammasome activation by *Toxoplasma* in mice was also recently evaluated (6,  
98 21). No cleavage of the mouse NLRP1 was observed in parasite-infected cells suggesting the  
99 NLRP1 response to *Toxoplasma* in mice might be cleavage-independent (6). However, the  
100 parasite effector(s) that activate the NLRP1 inflammasome are unknown.

101 To further explore the mechanism of activation of the Lewis rat NLRP1 inflammasome  
102 by *Toxoplasma*, we chose to take an unbiased approach to identify the *Toxoplasma* gene  
103 product(s) required for activation of Lewis rat BMDM cell death. Using a chemical mutagenesis  
104 screen followed by whole genome sequencing we identified three *Toxoplasma* dense granule

105 proteins (GRA35, GRA42 and GRA43) that are required for inflammasome activation in Lewis  
106 rat macrophages. Parasite strains deficient in GRA35, GRA42 or GRA43 induce significantly  
107 less pyroptosis and IL-1 $\beta$  processing and secretion. These results indicate that *Toxoplasma* dense  
108 granule proteins are novel mediators of NLRP1 inflammasome activation.

109

## 110 **Results**

### 111 **The NLRP3 inflammasome is not involved in *Toxoplasma*-induced Lewis rat macrophage** 112 **cell death**

113 We previously showed that *Toxoplasma* activates the NLRP1 inflammasome in Lewis rat  
114 macrophages resulting in rapid cell death (5). *Toxoplasma* activates both the NLRP1 and NLRP3  
115 inflammasomes in mice (21) but it is not known whether *Toxoplasma* also activates the NLRP3  
116 inflammasome in Lewis rat macrophages. To investigate this, Lewis rat macrophages were  
117 treated with NLRP3 inflammasome inhibitor MCC950 (22) or with the Caspase-1 inhibitor  
118 VX765 (which should inhibit all inflammasomes) (23) followed by *Toxoplasma* type I (RH)  
119 parasite infection. Infected macrophages treated with VX765 showed significantly higher cell  
120 viability compared to non-treated macrophages, whereas treatment with MCC950 did not prevent  
121 parasite-induced cell death (**Figure 1**). VX765 and MCC950 did not inhibit parasite invasion in  
122 Lewis rat macrophages (**Figure S1A**) nor parasite growth in HFFs (**Figure S1B**). As a positive  
123 control, MCC950 inhibited cell death and IL-1 $\beta$  release in response to Nigericin, a known  
124 NLRP3 agonist, in lipopolysaccharide (LPS)-primed Lewis rat macrophages (**Figure S1C and**  
125 **D**). Therefore, Lewis rat macrophage cell death upon *Toxoplasma* infection is likely entirely  
126 dependent on NLRP1.

127

128 ***Toxoplasma*-induced Lewis rat macrophage cell death is dependent on Golgi-protease ASP5**  
129 **but not MYR1**

130 To better understand the mechanism of NLRP1 inflammasome activation, we aimed to  
131 discover the *Toxoplasma* effector(s) that mediate the activation of the Lewis rat NLRP1  
132 inflammasome. We focused on parasite secretory proteins that can potentially interact with host  
133 cytosolic NLRP1 or interact with other host cytosolic proteins that modulate the activity of the  
134 inflammasome. Upon invasion, *Toxoplasma* secretes rhoptry proteins (ROPs) into the host cell  
135 cytosol (24). We previously showed that parasites treated with Mycalolide B, a compound that  
136 blocks *Toxoplasma* invasion but allows for secretion of microneme and rhoptry contents, were  
137 unable to induce Lewis rat macrophage IL-1 $\beta$  secretion and cell death (5) suggesting that ROPs  
138 are not the parasite effectors that activate the NLRP1 inflammasome. Once the parasite resides  
139 inside a host cell in a non-fusogenic parasitophorous vacuole (PV), dense granules discharge  
140 GRAs into the PV lumen, associated with the PV membrane (PVM), or are exported into the host  
141 cytosol (25). *Toxoplasma* aspartyl protease (ASP)5, a Golgi-resident protease that is  
142 phylogenetically related to *Plasmodium* Plasmepsin V, mediates the export of GRAs to the host  
143 cytosol and can influence the localization of several GRAs to the PVM (26-28). To investigate  
144 whether GRAs that localize at the PVM or GRAs that are exported to the host cytosol activate  
145 the NLRP1 inflammasome, cell viability of Lewis rat macrophages infected with  $\Delta asp5$  parasites  
146 was measured (**Figure 2A**). Compared to wild-type (WT) parasite infection,  $\Delta asp5$  parasites  
147 induced less macrophage cell death, and  $\Delta asp5$  parasites complemented with a Ty-tagged copy  
148 of ASP5 regained the ability to induce cell death (**Figure 2A, right panel**). MYR1, a putative  
149 *Toxoplasma* PVM translocon, mediates the export of GRAs, including GRA16 and GRA24, into  
150 the host cytosol (29).  $\Delta myr1$  parasites (**Figure S2A and C**) induced similar levels of Lewis rat

151 macrophage cell death compared to WT parasites (**Figure 2B**). Taken together, *Toxoplasma*-  
152 induced Lewis rat macrophage cell death is ASP5- but not MYR1-dependent suggesting that  
153 GRAs that localize to the PVM, but not GRAs exported to the host cytosol, are likely mediators  
154 of Lewis macrophage cell death.

155

### 156 **Isolation of *Toxoplasma* mutants that do not induce Lewis macrophage cell death**

157         Although GRAs that localize to the PVM are likely involved in NLRP1 inflammasome  
158 activation, the effector(s) are still unknown. To identify *Toxoplasma* gene product(s) required for  
159 NLRP1 inflammasome activation, we designed a chemical mutagenesis screen to isolate mutants  
160 that fail to induce Lewis rat macrophage cell death (**Figure 3A**). Type I (RH) parasites were  
161 mutagenized by *N*-ethyl-*N*-nitrosourea (ENU) or ethyl methanesulfonate (EMS), respectively.  
162 The populations of chemically mutagenized parasites were used to infect Lewis rat macrophages  
163 at a multiplicity of infection (MOI) of 0.2-0.3. *Toxoplasma*-induced macrophage cell death is a  
164 dominant trait, reinvasion of parasites into rare cells containing *Toxoplasma* mutants that do not  
165 activate the NLRP1 inflammasome would therefore still lead to macrophage cell death.  
166 Therefore, to inhibit reinvasion, extracellular parasites were washed from cells after 2 hours of  
167 infection and the media was replaced with fresh media that contained the glycosaminoglycan,  
168 dextran sulfate (DS), a glycan competitor that prevents host cell invasion by extracellular  
169 parasites (30). Parasites that retain the ability to induce macrophage cell death are released from  
170 the lysed cell into the supernatant, where the parasite is coated with DS, blocking re-invasion  
171 into a new host cell. Mutated parasites unable to induce macrophage cell death are able to  
172 replicate within the surviving macrophage. After 24 hours of infection, surviving cells were  
173 washed, thereby removing the extracellular parasites capable of inducing macrophage cell death



174 from the population. The surviving macrophages were then added to a monolayer of human  
175 foreskin fibroblasts (HFFs) so the parasites within the macrophages could continue to replicate  
176 until their natural egress from the macrophages.

177 After seven rounds of selection, a distinct phenotype (the cell viability of Lewis rat  
178 macrophages upon *Toxoplasma* infection is more than 50%) began to emerge in two independent  
179 populations of mutagenized parasites compared to WT and dimethyl sulfoxide (DMSO)-treated  
180 parasites (**Figure 3B**). After a further two rounds of selection, single parasites were cloned from  
181 the populations and individual clones were tested for their inability to induce Lewis macrophage  
182 cell death. Three independent mutant clones induced significantly less Lewis rat macrophage cell  
183 death (**Figure 3C**). Macrophage survival was linked to the ability of the parasite to replicate  
184 within the macrophage. As expected, 75% of the surviving macrophages infected with WT  
185 parasites contained only single parasites while only 25% of cells infected with the mutants  
186 contained single parasites (**Figure 3D**). Inflammasome activation is also characterized by active  
187 IL-1 $\beta$  secretion. We found a strong decrease in the amount of cleaved, active IL-1 $\beta$  (17 kD)  
188 secreted from macrophages infected with each of the mutant strains, compared to WT (**Figure**  
189 **3E**). Thus, the forward genetic selection strategy was successful in yielding *Toxoplasma* mutants  
190 deficient in the activation of the inflammasome in Lewis rat macrophages.

191

## 192 **Identification of single nucleotide variations in the mutants**

193 To identify the genes mutated in each clone, we performed whole genome sequencing of  
194 each mutant. Sequence comparisons relative to the parental strain revealed 16, 11 and 12 non-  
195 synonymous mutations in mutant #1, mutant #2 and mutant #3, respectively (**Table 1**). The three  
196 mutants did not have any mutated genes in common. To identify the causative mutations in these

197 mutants, we established a set of criteria to narrow the list of possible genes. The inflammasomes  
198 are expressed and assembled within the cytoplasm of host cells. We therefore chose to focus on  
199 *Toxoplasma* genes whose protein products contain predicted signal peptides. Additionally, we  
200 previously tested a large number of different *Toxoplasma* strains for their ability to activate the  
201 inflammasome and all strains tested were able to induce pyroptosis (5). We therefore focused on  
202 genes that were expressed (FPKM>10) across all strains based on our published RNAseq dataset  
203 for these strains (31). Using these criteria, we narrowed the list of candidate genes in these  
204 mutants to seven genes (**Figure 4A**).

205 To determine which of these genes are involved in Lewis rat NLRP1 inflammasome  
206 activation, we individually disrupted each candidate gene in the RH background (**Figure S2A**  
207 **and C**) and tested the resulting strains for their inability to induce macrophage cell death.  
208 Parasites in which we knocked out *TGGT1\_248260*, *SUB1*, *TGGT1\_203040*, or *ROP17* induced  
209 similar Lewis rat macrophage cell death compared to WT parasites (**Figure 4B**). Mutant #3 has  
210 only one candidate gene, *TGGT1\_226380*, encoding GRA35 (32). A mutation in this gene  
211 resulted in an early stop codon (**Figure 4A and Figure S3A**). In mutant #2, a mutation in  
212 *TGGT1\_237015* also resulted in an early stop codon (**Figure 4A and Figure S3A**). In mutant #1  
213 a mutation in the stop codon of *TGGT1\_236870* converted this stop codon into an Arginine (R),  
214 which resulted in an extended gene product (**Figure 4A and Figure S3A**). Lewis rat  
215 macrophages infected with parasites that contained individual disruptions in *GRA35*,  
216 *TGGT1\_237015* or *TGGT1\_236870* showed significantly less cell death compared to  
217 macrophages infected with WT parasites (**Figure 4C**). Complementation of knockout strains  
218 with WT alleles of *GRA35*, *TGGT1\_237015* and *TGGT1\_236870* restored their ability to induce  
219 Lewis rat macrophage cell death (**Figure 4C**). The replication of  $\Delta gra35$ ,  $\Delta TGGT1_237015$  and

220 *ΔTGGT1\_236870* parasites in infected Lewis rat macrophages was significantly enhanced  
221 compared to WT parasites and complemented parasites 24 hours after infection (**Figure 4D**).  
222 Similarly, type II (ME49) parasites in which *GRA35*, *TGME49\_237015* or *TGME49\_236870*  
223 were disrupted (**Figure S2C**) induced less Lewis macrophage cell death compared to  
224 macrophages infected with WT parasites (**Figure 4E**). We also sequenced these 3 genes in other  
225 independent mutants. Another mutation (Y121 mutant to stop codon) in *GRA35* was also found  
226 in one of these mutant clones (named mutant #4), which failed to induce Lewis rat macrophage  
227 cell death (**Figure S3A and Figure S4**). These results indicated that the gene products of *GRA35*,  
228 *TGGT1\_237015* and *TGGT1\_236870* mediate *Toxoplasma*-induced Lewis rat macrophage cell  
229 death.

230

### 231 ***TGGT1\_236870* and *TGGT1\_237015* encode for novel PV-localized dense granule proteins**

232 *GRA35* was identified as a novel PV-localized dense granule protein by Bio-ID using  
233 other GRAs as baits (32) but there are no reports on the gene products encoded by  
234 *TGGT1\_237015* and *TGGT1\_236870*. *GRA35*, *TGGT1\_237015* and *TGGT1\_236870* are small  
235 one exon genes that are expressed in all *Toxoplasma* life stages except in the sexual stages inside  
236 the cat ([www.toxodb.org](http://www.toxodb.org)). The predicted protein products of these genes lack predicted  
237 functional domains except for the C-terminal coiled-coil domain of *GRA35* (**Figure S3A**). The  
238 resulting proteins each have a signal peptide, one predicted transmembrane (TM) domain and are  
239 generally predicted to be very alpha helical except the gene product of *TGGT1\_236870* (**Figure**  
240 **S3A**). No *Toxoplasma* export element (TEXEL, RRLxx) motif (26) is present in the amino acid  
241 sequence of *GRA35*, *TGGT1\_237015* and *TGGT1\_236870*. Although these three genes are quite  
242 conserved among different *Toxoplasma* strains, the rates of non-synonymous/synonymous (NS/S)

243 polymorphisms between 64 different strains are higher at the C-terminus (starting after the TM  
244 domain) of each gene product (**Figure S3B to D**). BLAST analysis of the entire protein sequence  
245 revealed no predicted function of these three genes. Orthologs of *GRA35*, *TGGT1\_237015* and  
246 *TGGT1\_236870* were identified in other tissue cyst-forming coccidia, *Hammondia hammondi*,  
247 *Neospora caninum* and *Besnoitia besnoiti* (**Figure S5**). We also found that three *Toxoplasma*  
248 proteins, TGGT1\_225160, GRA36 (TGGT1\_213067) and TGGT1\_257970, shared high amino  
249 acid similarity (>40%) with GRA35 (**Figure S5A**). Parasites deficient in *TGGT1\_225160*,  
250 *GRA36* or *TGGT1\_257970* still induced similar level of Lewis rat macrophage cell death  
251 compared to infection with WT parasites suggesting these proteins do not share the GRA35  
252 function that mediates Lewis rat NLRP1 inflammasome activation (**Figure S6**).

253 To characterize GRA35, TGGT1\_237015 and TGGT1\_236870, we used complemented  
254 strains in which a C-terminally hemagglutinin (HA)-tagged version of each gene product is  
255 ectopically expressed in the knockout strains. The expression of each protein was confirmed by  
256 Western blot (**Figure 5A**). Both extracellular and intracellular parasites yielded a band migrating  
257 at identical size, suggesting GRA35, TGGT1\_237015 and TGGT1\_236870 did not undergo  
258 proteolytic modification in the process of secretion. The subcellular localization of each protein  
259 was observed in extracellular parasites. As previously reported, GRA35 is a dense granule  
260 protein that localized at punctuate structures which overlap with GRA7 while being excluded  
261 from rhoptries (**Figure 5B**). The gene products of *TGGT1\_237015* and *TGGT1\_236870* also  
262 showed co-localization with GRA7 but not ROP1 (**Figure 5B**). The three proteins were localized  
263 at the PVM and PV lumen in intracellular parasites (**Figure 7B, upper row**) suggesting they are  
264 indeed secreted *via* dense granules. We concluded from these data that TGGT1\_236870 and

265 TGGT1\_237015 are novel dense granule proteins and therefore we named them GRA42 and  
266 GRA43, respectively.

267

### 268 **Complementation of mutants with GRA35, GRA42 and GRA43 restores Lewis rat** 269 **inflammasome activation**

270 To confirm that the mutation in GRA35, GRA42 and GRA43 was indeed responsible for  
271 the failure to activate the inflammasome by our chemically mutagenized parasites, we expressed  
272 the WT allele of the gene in each mutant. Addition of WT version of *GRA35*, *GRA42* and  
273 *GRA43* to their respective mutant was sufficient to restore induction of Lewis rat macrophage  
274 cell death (**Figure 6A**). Similarly, macrophages infected with mutant strains expressing WT  
275 version of *GRA35*, *GRA42* or *GRA43* contained less replicating parasites compared to mutant-  
276 infected BMDMs (**Figure 6B**). We also observed an increase in the active IL-1 $\beta$  secreted from  
277 macrophages infected with the complemented strains compared to their mutant counterparts  
278 (**Figure 6C**). Overall these data indicate that GRA35, GRA42 and GRA43 are required for  
279 activation of the Lewis rat NLRP1 inflammasome by *Toxoplasma*.

280

### 281 **GRA42 and GRA43 influence the PVM localization of GRA35, as well as other PVM-** 282 **localized GRAs**

283 Lewis rat macrophages infected with individual knockouts of *GRA35*, *GRA42* or *GRA43*  
284 showed a similar level of reduced cell death compared to macrophages infected with WT  
285 parasites (**Figure 4C, right panel**). It is therefore likely that these three GRAs function in the  
286 same pathway that activates the NLRP1 inflammasome. To confirm this, we generated double  
287 and triple *GRA35*, *GRA42* and *GRA43* knockout parasites (**Figure S2B and C**). Single-, double-

288 or triple- *GRA35*, *GRA42* and *GRA43* knockout parasites induced similar levels of macrophage  
289 cell death (**Figure 7A**) indicating that these GRAs function in the same pathway. Possibly they  
290 form a protein complex that directly activates the inflammasome, or one of the GRAs activates  
291 the inflammasome and the other two are upstream in the pathway. To investigate this, we first  
292 determined the exact localization of *GRA35*, *GRA42* and *GRA43* in intracellular parasites.  
293 *GRA35* localized at the PVM, while *GRA42* and *GRA43* were predominantly localized in the  
294 PV lumen (**Figure 7B, upper row**). We then determined the localization of *GRA35*, *GRA42* and  
295 *GRA43* in the different knockout parasites. In  $\Delta gra42$  and  $\Delta gra43$  parasites, *GRA35* was mostly  
296 retained in the PV lumen and less of it was localized to the PVM, whereas the localization of  
297 *GRA42* and *GRA43* was unchanged regardless of the presence of *GRA35*, *GRA42* or *GRA43*  
298 (**Figure 7B, middle two row**). Previously, we found parasites deficient in *ASP5* induced less  
299 Lewis rat macrophage cell death (**Figure 2A**). *ASP5* deletion also resulted in mis-localization of  
300 certain PVM-localized GRAs (26, 27). To understand whether *ASP5* might influence Lewis rat  
301 macrophage cell death through these GRAs, the localization of *GRA35*, *GRA42* and *GRA43* was  
302 also observed in parasites lacking *ASP5*. In  $\Delta asp5$  parasites *GRA35* no longer localized to the  
303 PVM and was mostly present in the PV space (**Figure 7B, left bottom**). In contrast, *ASP5* did  
304 not influence the localization of *GRA42* and *GRA43* (**Figure 7B, middle and right bottom**).  
305 Therefore, these results revealed that *GRA42*, *GRA43*, and *ASP5* influence the PVM  
306 localization of *GRA35*. To understand whether *GRA35* is the only GRA of which the  
307 localization is influenced by *GRA42* and *GRA43*, we determined the localization of *GRA17* and  
308 *GRA23*, which are also PVM-localized GRAs, in  $\Delta gra42$  or  $\Delta gra43$  parasites (**Figure 7C**). In  
309 WT parasites, these two GRAs were entirely localized at the PVM (**Figure 7C, top row**). In  
310  $\Delta gra42$  parasites, *GRA17* and *GRA23* were mis-localized to the PV space, although a small

311 fraction localized to the PVM (**Figure 7C, middle row**). In  $\Delta gra43$  parasites, these two GRAs  
312 were mostly absent at the PVM instead being retained in PV lumen (**Figure 7C, bottom row**). In  
313 contrast to GRA42 and GRA43, parasites deficient in GRA35 did not result in mis-localization  
314 of these two PVM GRAs. Note that only a small amount of GRA17 is required to mediate  
315 normal small molecule permeability and prevent enlarged vacuoles (33), possibly explaining  
316 why we failed to see the established  $\Delta gra17$  ‘bubble vacuole’ phenotype in these vacuoles.  
317 Partial or no GRA17/GRA23 PVM staining was observed in more than 80% of the vacuoles of  
318  $\Delta gra42$  and  $\Delta gra43$  parasites (**Figure 7D**). Therefore, GRA42 and GRA43 not only influence  
319 GRA35 localization at the PVM but also affect the localization of other PVM-associated GRAs.

320

### 321 **No interaction between *Toxoplasma* GRA35 and Lewis rat NLRP1 in co-transfected** 322 **HEK293T cells**

323 GRA35 localized onto the PVM where its C-terminus possibly directly interacts with host  
324 cytosolic NLRP1. Because cell death occurs rapidly after parasite invasion (Cirelli et al., 2014),  
325 it is hard to detect the interaction between GRA35 and NLRP1 in parasite-infected macrophages.  
326 To investigate a direct interaction between Lewis rat NLRP1 and *Toxoplasma* GRA35,  
327 coimmunoprecipitation was performed in HEK293T cells transiently expressing FLAG-NLRP1  
328 and GRA35-HA. The lysis of co-transfected cells was subjected to immunoprecipitation by using  
329 HA antibody and FLAG antibody. However, GRA35-HA was not detected in the FLAG-  
330 immunoprecipitated fraction, nor was FLAG-NLRP1 detected in the HA-immunoprecipitated  
331 fraction (**Figure 8**). Thus, the Lewis rat NLRP1 does not directly interact with *Toxoplasma*  
332 GRA35 in co-transfected HEK293T cells.

333



334 ***Toxoplasma* deficient in GRA35, GRA42 or GRA43 do not establish chronic infection in**  
335 **Lewis rats, but have reduced fitness in the rats that *Toxoplasma* does not activate the**  
336 **NLRP1 inflammasome.**

337 Since GRA35, GRA42 and GRA43 are required for activation of the NLRP1  
338 inflammasome and parasite-induced pyroptosis in macrophages *in vitro*, we hypothesized that  
339 *Toxoplasma* strains deficient in these genes will fail to induce macrophage cell death *in vivo*,  
340 allowing the parasite to replicate and eventually disseminate to the brain leading to chronic  
341 infection. Removal of these genes does not lead to a general defect in parasite fitness in HFFs  
342 (34). We also found no significant difference in *in vitro* growth between WT parasites and  
343  $\Delta gra35$ ,  $\Delta gra42$  or  $\Delta gra43$  parasites in rat fibroblasts (**Figure S7A**). Lewis rats were  
344 intraperitoneally infected with the type II ME49 strain expressing RFP or the *GRA35*, *GRA42* or  
345 *GRA43* knockout strains generated in this background. In addition, susceptible F344 rats, which  
346 encode an NLRP1 protein resistant to *Toxoplasma*-mediated inflammasome activation (2, 4),  
347 were used as a control. Compare to Lewis rat macrophages, F344 rat macrophages did not  
348 undergo rapid cell death after infection with WT or  $\Delta gra35$ ,  $\Delta gra42$  or  $\Delta gra43$  parasites (**Figure**  
349 **S7B**). During the course of infection, none of the rats lost weight or showed obvious clinical  
350 symptoms of toxoplasmosis (**data not shown**). After 2 months, the rats were sacrificed and the  
351 presence of cysts in the brains was determined. Brains of F344 rats infected with ME49-RFP  
352 parasites contained an average of 293 cysts whereas, as expected, no detectable cysts were found  
353 in the brains of Lewis rats. F344 rats infected with  $\Delta gra35$ ,  $\Delta gra42$  or  $\Delta gra43$  parasites  
354 contained reduced cyst numbers (73 cysts, 55 cysts and 0 cysts per brain of rats infected with  
355  $\Delta gra35$ ,  $\Delta gra42$  or  $\Delta gra43$  parasites, respectively) (**Figure 9A**). This suggests that  $\Delta gra35$ ,  
356  $\Delta gra42$  and  $\Delta gra43$  parasites determine *in vivo* fitness independent of their role in



357 inflammasome activation. This was expected for  $\Delta gra42$  and  $\Delta gra43$  as these parasites have a  
358 defect in correct trafficking of GRAs to the PVM and some PVM GRAs, such as GRA17,  
359 determine parasite fitness. The absence of parasites in the brain of  $\Delta gra43$  parasite-infected F344  
360 rats was confirmed by diagnostic PCR based on the *Toxoplasma B1* gene (**Figure 9B**), which is a  
361 repetitive sequence in its genome (35). Reduced cyst number in F344 rats could be due to a  
362 defect of  $\Delta gra35$ ,  $\Delta gra42$  or  $\Delta gra43$  parasites in cyst formation. However,  $\Delta gra35$ ,  $\Delta gra42$  or  
363  $\Delta gra43$  parasites formed normal *in vitro* cysts under alkaline stress induction condition (**Figure**  
364 **S7C**), suggesting these GRAs play no role in cyst formation. Lewis rats infected with  $\Delta gra35$ ,  
365  $\Delta gra42$  or  $\Delta gra43$  parasites did not contain any brain cysts. Because the  $\Delta gra35$ ,  $\Delta gra42$  and  
366  $\Delta gra43$  parasites determine fitness independent of their role in inflammasome activation we  
367 cannot make conclusions on the role of NLRP1 inflammasome activation in Lewis rat sterile  
368 immunity to *Toxoplasma*.

369         Although  $\Delta gra35$ ,  $\Delta gra42$  or  $\Delta gra43$  seem to be generally much less virulent than WT in  
370 F344 rats we hypothesized that in Lewis rats their initial replication in macrophages might still  
371 allow them reach higher parasite numbers and disseminate compared to WT. Previously it was  
372 determined that higher parasite burdens in Lewis rats leads to higher anti-*Toxoplasma* antibody  
373 titers (2). We therefore compared the anti-*Toxoplasma* IgG titers in the sera obtained from all  
374 rats at 2 months post-infection (**Figure 9C**). Lewis rats infected with ME49-RFP parasites had  
375 lower anti-*Toxoplasma* IgG titers (1/3,200 - 1/6,400) compared to F344 rats (titers  $\geq$  1/25,600).  
376 Lewis rats infected with  $\Delta gra35$ ,  $\Delta gra42$  or  $\Delta gra43$  parasites had increased anti-*Toxoplasma* IgG  
377 titers (1/6,400 – 1/12,800, 1/6,400 – 1/25,600, 1/12,800 – 1/25,600, respectively) whereas titers  
378 were slightly decreased in F344 rats infected with  $\Delta gra42$  or  $\Delta gra43$  parasites (**Figure 9C**). The  
379 increased titers of Lewis rats infected with  $\Delta gra35$ ,  $\Delta gra42$  or  $\Delta gra43$ , compared to WT parasite

380 infected rats, suggest that  $\Delta gra35$ ,  $\Delta gra42$  or  $\Delta gra43$  parasites bypassed the NLRP1  
381 inflammasome barrier in macrophages allowing them to replicate and possibly disseminate.  
382 However, we were unable to observe detectable IL-1 $\beta$  level in the serum of parasite-infected  
383 Lewis rats and F344 rats regardless of parasite strain (**data not shown**). Taken together, even  
384 though GRA35, GRA42 and GRA43 are involved in activation of the Lewis rat NLRP1  
385 inflammasome *in vitro*, *Toxoplasma* deficient in these genes still fail to develop cysts in the brain  
386 of Lewis rats likely because they are also required for *in vivo* fitness.

387

## 388 **Discussion**

389 We and others previously showed that Lewis rat macrophage cell death upon *Toxoplasma*  
390 infection is determined by the NLRP1 inflammasome (4, 5). This study indicates that GRA35,  
391 GRA42 and GRA43 are parasite effectors that are involved in Lewis rat NLRP1 inflammasome  
392 activation. The fact that  $\Delta asp5$  parasites, but not  $\Delta myr1$  parasites, no longer induce *Toxoplasma*-  
393 induced Lewis rat macrophage cell death suggests that this cell death is mediated by PVM-  
394 localized GRAs. Several GRAs secreted onto the PVM have been identified as parasite effectors  
395 involved in host-parasite interactions including modulation of host signaling pathways, evasion  
396 of host immune responses, and nutrition acquisition (25). GRA6 locates at the PVM, where it  
397 selectively activates the host transcription factor nuclear factor of activated T cells 4 (NFAT4)  
398 via interaction with host Calcium modulating ligand (CAMLG) (36). GRA7 is a transmembrane  
399 protein that spans the PV and extends into the host cytosol, where it interacts with ROP  
400 complexes (37). GRA7 also binds directly to the oligomers of immunity-related GTPase Irga6  
401 eventually leading to disassembly (37). GRA15 from type II *Toxoplasma*, another PVM-  
402 associated GRA, is involved in host NF- $\kappa$ B activation, which promotes the production of pro-

403 inflammatory cytokines (38). Two additional dense granule proteins, GRA17 and GRA23, which  
404 are also located at the PV membrane, are responsible for small-molecule transport between the  
405 host cytosol and the vacuole lumen (33). Of the three GRAs we identified, only GRA35  
406 localized at the PVM, while GRA42 and GRA43 are mainly localized inside the PV. This  
407 suggests that GRA35 might be the mediator of inflammasome activation as it has 1 TM domain  
408 and one part of GRA35 could face the host cytoplasm and possibly interact with the host  
409 cytosolic inflammasome. Since GRA35, GRA42 and GRA43 function in the same pathway that  
410 modulate inflammasome activation and GRA42 and GRA43 influence the PVM localization of  
411 GRA35 and other GRAs, it is likely that GRA42 and GRA43 function as protein chaperones that  
412 help GRAs localize to the PVM where GRA35 or another unknown GRA then activates the  
413 NLRP1 inflammasome either directly or indirectly.

414         Although our results indicate GRA35 could be the parasite effector that directly activates  
415 the Lewis rat NLRP1 inflammasome, the mechanism of activation is still unclear. Cleavage of  
416 NLRP1 is required for the activation of the inflammasome by Anthrax lethal toxin (20). A recent  
417 study demonstrated that proteolysis can act as a common activator of diverse NLRP1 variants  
418 from mice and humans (39). However, GRA35 does not have predicted protease domains and  
419 cleavage of NLRP1 was not found in GRA35 transfected-HEK293T cell line transiently  
420 expressing Lewis rat NLRP1, nor was a direct interaction between GRA35 and NLRP1 observed  
421 (**Figure 8**). *Toxoplasma* activation of mouse NLRP1 does not seem to involve cleavage of  
422 NLRP1 suggesting it might activate NLRP1 in mice through a novel mechanism (6). GRA35 has  
423 orthologues in *Hammondia*, *Neospora* and *Besnoitia*. *Neospora caninum* is able to induce cell  
424 death in Lewis rat macrophages (**Figure S8**), suggesting the function of GRA35 is conserved in  
425 cyst-forming coccidia.

426           The mutations of GRA35 in mutant #3 and mutant #4 are in the transmembrane domain,  
427 which results in GRA35 lacking its entire C-terminus containing two coiled-coil domains.  
428 Coiled-coil domains function in many biological processes, including protein-DNA binding and  
429 protein-protein interaction (40). However, no directly interaction between Lewis rat NLRP1 and  
430 *Toxoplasma* GRA35 was found in co-transfected HEK293T cells. Previously, we described that  
431 parasite infection of murine macrophage cell lines or human fibroblasts stably expressing Lewis  
432 rat NLRP1 does not trigger cell death (5). This suggests that murine macrophages and human  
433 fibroblasts lack a factor needed for activation of the Lewis rat NLRP1 inflammasome by  
434 *Toxoplasma*. Unfortunately, this also prevents us from using non-Lewis rat cell lines to  
435 determine if transfection of GRA35 is sufficient to activate the NLRP1 inflammasome. Overall  
436 our data are consistent with GRA35 interacting with a rat-specific factor that subsequently  
437 mediates the activation of the NLRP1 inflammasome. This pattern has been demonstrated for  
438 GRA6, whose C-terminus interacts with host cytosolic protein CAMLG, which leads to NFAT4  
439 activation (36). It is also possible that GRA35 interacts with or modifies a Lewis rat-specific  
440 protein, which is sensed by NLRP1, similar to NLRC4 recognition of a NAIP5/NAIP6/flagellin  
441 complex (14, 41), or possibly inhibits the negatively regulation of NLRP1 by this rat factor. A  
442 further complication is that some inflammasomes do not directly interact with a PAMP but rather  
443 sense changes to the cellular milieu induced by infection. For example, NLRP3 senses diverse  
444 cellular signals, such as K<sup>+</sup> efflux, Ca<sup>2+</sup> signaling, reactive oxygen species (ROS), mitochondrial  
445 dysfunction, and lysosomal rupture, which are the triggers for NLRP3 inflammasome activation  
446 (42). It is therefore possible that NLRP1 does not directly interact with a *Toxoplasma* effector  
447 but rather detects changes in the cell induced by *Toxoplasma* infection. For instance, cytosolic  
448 ATP depletion is sensed by NLRP1b leading to inflammasome activation (43, 44). Another

449 hypothesis is that GRA35 maybe function as a PVM platform that supports or modifies other  
450 parasite effectors that somehow activate the NLRP1 inflammasome. This model has been  
451 described for the ROP5/ROP18/ROP17/GRA7 complex, which locates at the PVM and prevents  
452 PVM rupture by preventing the accumulation of Immunity related GTPases (IRGs) (37, 45).

453 Although ASP5 influences GRA35 localization, there is no TEXEL motif present in  
454 GRA35 or in GRA42 and GRA43 suggesting that these three proteins are not direct substrates of  
455 ASP5. It is likely that another protein with a TEXEL motif mediates GRA35 localization to the  
456 PVM, or functions as a regulator of GRA42 and GRA43 function. Identification of this protein  
457 could help us gain a better understanding of how GRA35, GRA42 and GRA43 activate the  
458 Lewis rat NLRP1 inflammasome.

459 Unexpectedly, parasites lacking GRA35 were still unable to establish a chronic infection  
460 in Lewis rat. Because GRA42 and GRA43 are important for correct localization of other GRAs  
461 at the PVM (**Figure 7B and C**), some of which determine parasite fitness, it was expected that  
462 parasites lacking GRA42 or GRA43 would be less virulent *in vivo*, which makes it difficult to  
463 establish their role in NLRP1 activation on parasite *in vivo* fitness. Despite the failure in tissue  
464 cyst formation, the higher anti-*Toxoplasma* IgG titers in the serum of Lewis rats infected with  
465  $\Delta gra35$ ,  $\Delta gra42$  or  $\Delta gra43$  parasites possibly indicates that the Lewis rat inflammasome was not  
466 activated during acute infection, allowing a limited proliferation of tachyzoites but that these  
467 parasites were eventually eliminated by other mechanisms. However, no parasites were detected  
468 in peritoneal organs (spleen and liver) or peritoneal cavity of Lewis rats and *Toxoplasma*-  
469 susceptible F344 rats by B1-PCR and *in vivo* imaging at 2 days post-infection (**data not shown**),  
470 suggesting the rat in general is resistant to the initial stage of infection. It remains unclear what  
471 mechanisms mediate parasite resistance in rats in which *Toxoplasma* does not activate the

472 NLRP1 inflammasome (e.g. F344 rats). Because parasites lacking GRA35, GRA42 or GRA43  
473 also had a defect in tissue cyst formation in susceptible F344 rats, which possess a *Toxoplasma*-  
474 resistant variant of *Nlrp1*, GRA35, GRA42 and GRA43 also have an inflammasome-independent  
475 role in the pathogenesis of the parasite *in vivo*.

476 Overall, the results presented here show that three dense granule proteins of *Toxoplasma*  
477 *gondii* are necessary for Lewis rat NLRP1 inflammasome activation. How these proteins  
478 function to activate the NLRP1 inflammasome is not yet known, but the data suggest a model  
479 where GRA42 and GRA43 mediate GRA35 localization to the PVM, where the GRA35 faces  
480 the host cytosol and mediates indirectly the activation of the NLRP1 inflammasome. Future  
481 experiments will be needed to determine the precise mechanism by which GRA35 mediates the  
482 activation of the NLRP1 inflammasome and GRA42 and GRA43 influence the localization of  
483 GRAs to the PVM.

484

## 485 **Materials and Methods**

### 486 **Ethics statement**

487 All animal experiments were performed in strict accordance with the recommendations in  
488 the Guide for the Care and Use of Laboratory Animals of the National Institutes of Health and  
489 the Animal Welfare Act, approved by the Institutional Animal Care and Use Committee at UC  
490 Davis (assurance number A-3433-01).

491

### 492 **Reagents and antibodies**

493 ENU and EMS were purchased from Sigma-Aldrich. CellTiter 96 AQueous One Solution  
494 Cell Proliferation Assay was obtained from Promega. Dextran sulfate sodium salt was obtained

495 from Santa Cruz Biotechnology. LPS was purchased from Calbiochem/EMD Biosciences.  
496 Caspase-1 inhibitor VX765 was purchased from Selleck chemicals. NLRP3 inflammasome  
497 inhibitor MCC950 was purchased from AdipoGen Life Sciences, Inc. Nigericin (Sodium Salt)  
498 was purchased from MilliporeSigma. Rabbit anti-IL-1 $\beta$  was purchased from Abcam. Rat anti-  
499 HA (3F10) antibody was obtained from Roche. Mouse anti-FLAG M2 antibody was purchased  
500 from Sigma-Aldrich. Secondary HRP-conjugated antibodies were purchased from Jackson  
501 ImmunoResearch. Alexa Fluor 448 and 594 secondary antibodies were obtained from Invitrogen.

502

### 503 **Rats and Parasites**

504 Lewis (LEW/Crl; LEW) rats and F344 (F344/DuCrI; CDF) rats were purchased from  
505 Charles River Laboratories (Wilmington, MA) at 6-8 weeks old. Lewis rat bone marrow-derived  
506 macrophages (BMDMs) were prepared as previously described (5). *Toxoplasma gondii*  
507 tachyzoites from Type I (RH) expressing luciferase and GFP were used for mutagenesis. RH  
508 parasites without, luciferase and lacking the *HXGPRT* gene (RH $\Delta$ *hxgprt*) were used for  
509 generating knockouts. RH parasites without, luciferase and lacking the *HXGPRT* gene and *Ku80*  
510 gene (RH $\Delta$ *hxgprt* $\Delta$ *ku80*) were used as WT control of  $\Delta$ *asp5* parasites. Type II (ME49)  
511 engineered to express RFP were a gift from Dr. Michael Grigg. RH $\Delta$ *Sub1* was a kind gift from  
512 Dr. Vern Carruthers and generated as described (46). RH $\Delta$ *asp5* and RH-ASP5-Ty were kind gifts  
513 from Dr. Mohamed-Ali Hakimi and generated as described (28). All parasite strains were  
514 routinely passaged *in vitro* in monolayers of HFFs.

515

### 516 **Mutagenesis Screen**

517 Intracellular RH parasites expressing GFP and Luciferase were treated with ENU (40  
518  $\mu$ M), EMS (100  $\mu$ M) or DMSO for 4 hours. Parasites were washed three times with PBS,  
519 syringe lysed and allowed to infect fresh HFFs. For selection, Lewis BMDMs were infected with  
520 parasite populations (MOI = 0.2 – 0.3) for 2 hours. Non-invading parasites were removed by  
521 washing cells with PBS three times. Media was replaced with media containing 30 mg/ml  
522 dextran sulfate. At 24 hours post-infection, extracellular parasites were removed by washing  
523 cells with PBS three times. Cells were scraped into fresh media and overlaid onto fresh HFFs.  
524 After nine rounds selection, parasites were cloned via serial dilution. Parasite DNA was isolated  
525 using Qiagen DNeasy Blood & Tissue Kit according to manufacturer's protocol. Illumina  
526 sequencing was performed on Illumina HiSeq 2000 or MiSeq. Reads were aligned using type I  
527 GT1 (v9.0) as reference genome.

528

### 529 **Generation of parasite strains**

530 Individual knockout of candidate genes was performed using CRISPR-Cas9. Sequences  
531 targeting candidate genes were cloned into the pSS013-Cas9 vector (47). The sequences are  
532 available in **Supplementary Table 1**. To generate the *MYRI* knockout strain and knockout  
533 strains for the candidate hits from sequenced mutant clones, plasmids containing sgRNAs were  
534 co-transfected with XhoI (New England Biolabs)-linearized pTKOatt, which contains the  
535 *HXGPRT* selection cassette (38), into  $RH\Delta hxgprt$  parasites at a ratio 10:1 (sgRNAs: linearized  
536 pTKOatt plasmid). 24 hours post-transfection, populations were selected with mycophenolic acid  
537 (50  $\mu$ g/ml) and xanthine (50  $\mu$ g/ml) and cloned by limiting dilution (**Figure S2A**). Knockout was  
538 assessed by PCR (**Figure S2C**). Complemented strains were generated by cloning the gene with  
539 its putative promoter (~2000 bp upstream of start codon) with a C-terminal hemagglutinin (HA)-



540 tag sequence into pENTR using TOPO cloning (Invitrogen) and then into pTKOatt using LR  
541 recombination (Invitrogen) (38). Prior to transfection, plasmids were linearized using a  
542 restriction enzyme with a unique restriction site. Parasites were co-transfected with the linearized  
543 complemented plasmid and a plasmid containing the dihydrofolate reductase (DHFR) resistance  
544 cassette at a ratio of 20:1. 24 hours post-transfection, populations were selected with  
545 pyrimethamine (1  $\mu$ M) and cloned by limiting dilution. Presence of the tagged gene was  
546 determined by immunofluorescent assay (IFA) and Western blot. To generate the double and  
547 triple knockout strains,  $\Delta$ *gra35* parasites were co-transfected with separate plasmids containing  
548 sgRNAs against GRA42 or GRA43 together with NotI (New England Biolabs)-linearized  
549 pLoxp-DHFR-mCherry (48), which also contains a pyrimethamine resistance cassette, at a ratio  
550 of 5:1 (**Figure S2B**). After two rounds of pyrimethamine selection and limiting dilution cloning,  
551 the double and triple knockout parasites were assessed by PCR and confirmed by sequencing in  
552 both loci. GRA42 and GRA43 double knockout strain was generated from  $\Delta$ *gra42* parasites by  
553 using same strategy. To generate *TGGT1\_225160*, *GRA36* or *TGGT1\_257970* knockout strain,  
554 plasmids containing sgRNAs were co-transfected with NotI (New England Biolabs)-linearized  
555 pLoxp-DHFR-mCherry at a ratio of 5:1 (**Figure S5A**). After two rounds of pyrimethamine  
556 selection and limiting dilution cloning, the knockout parasites were assessed by PCR (**Figure**  
557 **S5B**) and confirmed by sequencing.

558

### 559 **Cell viability, parasite per vacuole counts, IL-1 $\beta$ measurement**

560 Lewis rat BMDMs were stimulated with or without 50  $\mu$ M of VX765 or 10  $\mu$ M of  
561 MCC950 for 2 hours followed by parasite infection. F344 rat BMDMs were infected with  
562 parasites for 24 hours. Cell viability was measured by MTS as previously described (5). Parasites

563 per vacuole counts were performed as previously described (5). In LPS-primed BMDMs, the  
564 culture supernatants were collected for IL-1 $\beta$  measurement by ELISA as previously described (5).  
565 IL-1 $\beta$  in infected cell culture supernatants was also concentrated using Amicon filters (3 kD  
566 molecular weight cutoff) (Millipore) and detected by Western blot.

567

## 568 **Coimmunoprecipitation**

569 Plasmids expressing a C-terminal HA-tagged GRA35 without signal peptide (pcDNA3.1-  
570 GRA35-HA) and N-terminal FLAG-tagged Lewis rat variant of NLRP1 (pCMV-FLAG-NLRP1)  
571 were mixed at the ratio of 1:1 and transfected to HEK293T cells using X-tremeGENE 9 DNA  
572 Transfection Reagent (Roche) according to the manufacturer's instructions. As controls, cells  
573 were also transfected with GRA35-HA + FLAG empty vector and pcDNA3.1 empty vector +  
574 FLAG-NLRP1 under the same conditions. After 30 hours transfection, cells were lysed in IP-  
575 lysis buffer (50 mM Tris pH7.4, 150 mM NaCl, 0.5% Triton X-100) containing 1  $\times$  protease  
576 inhibitor and 1 mM PMSF. The cell lysates were incubated with protein G magnetic beads pre-  
577 bound with rat anti-HA or mouse anti-FLAG antibody at 4  $^{\circ}$ C for 1 hour with rotation. After  
578 washing with IP-lysis buffer, proteins bound to the beads were solubilized in SDS-loading buffer  
579 by boiling for 5 minutes and examined by Western blot analysis. GRA35-HA was detected by rat  
580 anti-HA antibody, FLAG-NLRP1 was detected by mouse anti-FLAG antibody.

581

## 582 **Western blot**

583 To detect activated IL-1 $\beta$ , concentrated culture supernatants were separated on 12% SDS-  
584 PAGE gels and transferred to PVDF membrane (Bio-Rad., USA). To detect HA-tagged-GRA35,  
585 GRA42 or GRA43 expression, cell lysates made from intracellular parasites and extracellular

586 parasites were separated onto 12% SDS-PAGE gels and transferred to PVDF membrane. To  
587 detect interaction between GRA35-HA and FLAG-NLRP1, the coimmunoprecipitated samples  
588 were separated onto 12% SDS-PAGE gels and transferred to PVDF membrane. Western blot  
589 analysis was performed as previously described (38).

590

#### 591 **Invasion assay**

592 Lewis rat BMDMs were stimulated with or without 50  $\mu$ M of VX765 or 10  $\mu$ M of  
593 MCC950 for 2 hours followed by parasite infection. After 30 minutes infection, a red/green  
594 invasion assay was performed as previously described for indirect immunofluorescence (49).

595

#### 596 **Immunofluorescent assay**

597 Extracellular parasites released from syringe-lysed HFFs were loaded onto coverslips and  
598 fixed with 100% ice cold methanol for 5 minutes. Colocalization studies were performed with  
599 anti-GRA7 or anti-ROP1 and anti-HA antibodies. Alexa Fluor 488 and 594 secondary antibodies  
600 were used as previously described (38). To determine the localization of GRAs inside host cells,  
601 HFFs were infected with the different parasite strains for 24-30 hours, fixed with 3%  
602 formaldehyde for 20 minutes, permeabilized with 0.2% Triton X-100, followed by staining with  
603 rat anti-HA antibodies (1/500 dilution) or mouse monoclonal antibodies against *Toxoplasma*  
604 surface antigen (SAG1). Alexa Fluor 488 and 594 secondary antibodies were used as previously  
605 described (38).

606

#### 607 ***In vitro* cyst induction**

608 Parasites were propagated in HFFs on coverslips under bradyzoite-inducing conditions  
609 (RPMI 1640 medium supplemented with 50 mM HEPES and 1% fetal bovine serum, pH 8.2,  
610 ambient CO<sub>2</sub>) for 3 days. Cells were then fixed with 100% ice-cold methanol, permeabilized  
611 with 0.2% Triton X-100, and the cysts were stained by FITC-DBA (Vector Laboratories).

612

### 613 ***In vivo* infection, cyst counting, diagnostic PCR and serological detection**

614 *Toxoplasma* tachyzoites were harvested from cell culture and released by passage  
615 through a 27-gauge needle, followed by a 30-gauge needle. Three Lewis rats and three F344 rats  
616 at 8 weeks old were infected intraperitoneally (i.p.) with  $2 \times 10^6$  parasites of each strain and  
617 parasite viability of the inoculums was determined in a plaque assay after infection. At 60 days  
618 post-infection, the rats were sacrificed and the brains were harvested. Following homogenization  
619 of brains by passaging through a 21-gauge needle, cysts were stained by FITC-DBA. To detect  
620 the presence of parasite in the brains of infected rats, genomic DNA of homogenized brains was  
621 isolated using Qiagen DNeasy Blood & Tissue Kits (Qiagen). Diagnostic PCR targeting the B1  
622 gene was performed by using the primer sets listed in **Supplementary Table 1**. To determine the  
623 anti-*Toxoplasma* IgG response of infected rats, serum was separated from the blood obtained at  
624 60 days post-infection and anti-*Toxoplasma* IgG titer was detected using an enzyme-linked  
625 immunosorbent assay (ELISA). The plates were coated with 0.25 µg of whole parasite lysate  
626 produced by several freeze-thaw cycles. After blocking with 2% BSA in PBS-0.05% Tween-20,  
627 serial dilutions of serum was added and incubated at room temperature for at least 2 hours,  
628 followed by incubation with 1/2000 diluted HRP-conjugated goat anti-rat IgG at room  
629 temperature for 2 hours. Finally, after washing with PBS-0.05% Tween-20, 100 µl of substrate  
630 solution (ABTS solution from Sigma) was added to the wells and after 30 minutes the reaction

631 was stopped by the addition of 50  $\mu$ l of 0.3 M Oxalic acid, and optical density at 405 nm was  
632 measured. The titer corresponds to the dilution which gave an OD<sub>405</sub> reading two-fold higher  
633 than the average of uninfected rat serum.

634

### 635 **Acknowledgements**

636 This study was supported by the National Institutes of Health (R01-AI080621) awarded  
637 to J.P.J.S. K.M.C was supported by National Institutes of Health (F31-AI104170). M.A.H was  
638 supported by a Wellcome Trust-MIT postdoctoral fellowship.

639

### 640 **Author contributions**

641 J.P.J.S., Y.W. and K.M.C. designed experiments. Y.W. and K.M.C. performed and  
642 interpreted most of the experimental works. Y.W. performed all the experiments of figure 1, 2, 5,  
643 7, 8, supplementary figure 1, 3 and 7. K.M.C. performed all the experiments of figure 3, 6,  
644 supplementary figure 4 and 8. Y.W. and K.M.C. performed all the experiments of figure 4,  
645 supplementary figure 2 and 5 Y.W. and L.O.S. conducted the *in vivo* infection experiment of  
646 figure 9. P.D.C.B. generated knockout strains and performed cell viability assay with these  
647 parasites in supplementary figure 6. M.A.H. and V.B. performed whole genomic sequencing and  
648 analyzed the sequencing data. P.P. and A.M. performed necropsy and pathological observation  
649 for *in vivo* studies. J.P.J.S., Y.W. and K.M.C. wrote the paper with contributions from all  
650 authors.

651

652

653

654 **References**

- 655 1. Hill D, Dubey JP. 2002. *Toxoplasma gondii*: transmission, diagnosis and prevention. Clin  
656 Microbiol Infect 8:634-40.
- 657 2. Sergent V, Cautain B, Khalife J, Deslee D, Bastien P, Dao A, Dubremetz JF, Fournie GJ,  
658 Saoudi A, Cesbron-Delauw MF. 2005. Innate refractoriness of the Lewis rat to  
659 toxoplasmosis is a dominant trait that is intrinsic to bone marrow-derived cells. Infect  
660 Immun 73:6990-7.
- 661 3. Cavailles P, Sergent V, Bisanz C, Papapietro O, Colacios C, Mas M, Subra JF, Lagrange  
662 D, Calise M, Appolinaire S, Faraut T, Druet P, Saoudi A, Bessieres MH, Pipy B,  
663 Cesbron-Delauw MF, Fournie GJ. 2006. The rat Toxo1 locus directs toxoplasmosis  
664 outcome and controls parasite proliferation and spreading by macrophage-dependent  
665 mechanisms. Proc Natl Acad Sci U S A 103:744-9.
- 666 4. Cavailles P, Flori P, Papapietro O, Bisanz C, Lagrange D, Pilloux L, Massera C,  
667 Cristinelli S, Jublot D, Bastien O, Loeuillet C, Aldebert D, Touquet B, Fournie GJ,  
668 Cesbron-Delauw MF. 2014. A highly conserved Toxo1 haplotype directs resistance to  
669 toxoplasmosis and its associated caspase-1 dependent killing of parasite and host  
670 macrophage. PLoS Pathog 10:e1004005.
- 671 5. Cirelli KM, Gorfu G, Hassan MA, Printz M, Crown D, Leppla SH, Grigg ME, Saeij JP,  
672 Moayeri M. 2014. Inflammasome sensor NLRP1 controls rat macrophage susceptibility  
673 to *Toxoplasma gondii*. PLoS Pathog 10:e1003927.
- 674 6. Ewald SE, Chavarria-Smith J, Boothroyd JC. 2014. NLRP1 is an inflammasome sensor  
675 for *Toxoplasma gondii*. Infect Immun 82:460-8.

- 676 7. Kayagaki N, Stowe IB, Lee BL, O'Rourke K, Anderson K, Warming S, Cuellar T, Haley  
677 B, Roose-Girma M, Phung QT, Liu PS, Lill JR, Li H, Wu J, Kummerfeld S, Zhang J, Lee  
678 WP, Snipas SJ, Salvesen GS, Morris LX, Fitzgerald L, Zhang Y, Bertram EM, Goodnow  
679 CC, Dixit VM. 2015. Caspase-11 cleaves gasdermin D for non-canonical inflammasome  
680 signalling. *Nature* 526:666-71.
- 681 8. Shi J, Zhao Y, Wang K, Shi X, Wang Y, Huang H, Zhuang Y, Cai T, Wang F, Shao F.  
682 2015. Cleavage of GSDMD by inflammatory caspases determines pyroptotic cell death.  
683 *Nature* 526:660-5.
- 684 9. Miao EA, Leaf IA, Treuting PM, Mao DP, Dors M, Sarkar A, Warren SE, Wewers MD,  
685 Aderem A. 2010. Caspase-1-induced pyroptosis is an innate immune effector mechanism  
686 against intracellular bacteria. *Nat Immunol* 11:1136-42.
- 687 10. Jensen KD, Wang Y, Wojno ED, Shastri AJ, Hu K, Cornel L, Boedec E, Ong YC, Chien  
688 YH, Hunter CA, Boothroyd JC, Saeij JP. 2011. *Toxoplasma* polymorphic effectors  
689 determine macrophage polarization and intestinal inflammation. *Cell Host Microbe*  
690 9:472-83.
- 691 11. Mordue DG, Sibley LD. 2003. A novel population of Gr-1+-activated macrophages  
692 induced during acute toxoplasmosis. *J Leukoc Biol* 74:1015-25.
- 693 12. Lambert H, Barragan A. 2010. Modelling parasite dissemination: host cell subversion and  
694 immune evasion by *Toxoplasma gondii*. *Cell Microbiol* 12:292-300.
- 695 13. Weidner JM, Barragan A. 2014. Tightly regulated migratory subversion of immune cells  
696 promotes the dissemination of *Toxoplasma gondii*. *Int J Parasitol* 44:85-90.
- 697 14. Kofoed EM, Vance RE. 2011. Innate immune recognition of bacterial ligands by NAIPs  
698 determines inflammasome specificity. *Nature* 477:592-5.

- 699 15. Petrilli V, Papin S, Dostert C, Mayor A, Martinon F, Tschopp J. 2007. Activation of the  
700 NALP3 inflammasome is triggered by low intracellular potassium concentration. *Cell*  
701 *Death Differ* 14:1583-9.
- 702 16. Thomas PG, Dash P, Aldridge JR, Jr., Ellebedy AH, Reynolds C, Funk AJ, Martin WJ,  
703 Lamkanfi M, Webby RJ, Boyd KL, Doherty PC, Kanneganti TD. 2009. The intracellular  
704 sensor NLRP3 mediates key innate and healing responses to influenza A virus via the  
705 regulation of caspase-1. *Immunity* 30:566-75.
- 706 17. Pelegrin P, Surprenant A. 2007. Pannexin-1 couples to maitotoxin- and nigericin-induced  
707 interleukin-1beta release through a dye uptake-independent pathway. *J Biol Chem*  
708 282:2386-94.
- 709 18. Kalantari P, DeOliveira RB, Chan J, Corbett Y, Rathinam V, Stutz A, Latz E, Gazzinelli  
710 RT, Golenbock DT, Fitzgerald KA. 2014. Dual engagement of the NLRP3 and AIM2  
711 inflammasomes by plasmodium-derived hemozoin and DNA during malaria. *Cell Rep*  
712 6:196-210.
- 713 19. Newman ZL, Printz MP, Liu S, Crown D, Breen L, Miller-Randolph S, Flodman P,  
714 Leppla SH, Moayeri M. 2010. Susceptibility to anthrax lethal toxin-induced rat death is  
715 controlled by a single chromosome 10 locus that includes *rNlrp1*. *PLoS Pathog*  
716 6:e1000906.
- 717 20. Levinsohn JL, Newman ZL, Hellmich KA, Fattah R, Getz MA, Liu S, Sastalla I, Leppla  
718 SH, Moayeri M. 2012. Anthrax lethal factor cleavage of *Nlrp1* is required for activation  
719 of the inflammasome. *PLoS Pathog* 8:e1002638.



- 720 21. Gorfu G, Cirelli KM, Melo MB, Mayer-Barber K, Crown D, Koller BH, Masters S, Sher  
721 A, Leppla SH, Moayeri M, Saeij JP, Grigg ME. 2014. Dual role for inflammasome  
722 sensors NLRP1 and NLRP3 in murine resistance to *Toxoplasma gondii*. *MBio* 5.
- 723 22. Gov L, Schneider CA, Lima TS, Pandori W, Lodoen MB. 2017. NLRP3 and Potassium  
724 Efflux Drive Rapid IL-1beta Release from Primary Human Monocytes during  
725 *Toxoplasma gondii* Infection. *J Immunol* 199:2855-2864.
- 726 23. Wannamaker W, Davies R, Namchuk M, Pollard J, Ford P, Ku G, Decker C, Charifson P,  
727 Weber P, Germann UA, Kuida K, Randle JC. 2007. (S)-1-((S)-2-[[1-(4-amino-3-chloro-  
728 phenyl)-methanoyl]-amino]-3,3-dimethyl-butanoyl)-pyrrolidine-2-carboxylic acid  
729 ((2R,3S)-2-ethoxy-5-oxo-tetrahydro-furan-3-yl)-amide (VX-765), an orally available  
730 selective interleukin (IL)-converting enzyme/caspase-1 inhibitor, exhibits potent anti-  
731 inflammatory activities by inhibiting the release of IL-1beta and IL-18. *J Pharmacol Exp*  
732 *Ther* 321:509-16.
- 733 24. Carruthers VB, Sibley LD. 1997. Sequential protein secretion from three distinct  
734 organelles of *Toxoplasma gondii* accompanies invasion of human fibroblasts. *Eur J Cell*  
735 *Biol* 73:114-23.
- 736 25. Hakimi MA, Olias P, Sibley LD. 2017. *Toxoplasma* Effectors Targeting Host Signaling  
737 and Transcription. *Clin Microbiol Rev* 30:615-645.
- 738 26. Coffey MJ, Sleebs BE, Uboldi AD, Garnham A, Franco M, Marino ND, Panas MW,  
739 Ferguson DJ, Enciso M, O'Neill MT, Lopaticki S, Stewart RJ, Dewson G, Smyth GK,  
740 Smith BJ, Masters SL, Boothroyd JC, Boddey JA, Tonkin CJ. 2015. An aspartyl protease  
741 defines a novel pathway for export of *Toxoplasma* proteins into the host cell. *Elife* 4.

- 742 27. Hammoudi PM, Jacot D, Mueller C, Di Cristina M, Dogga SK, Marq JB, Romano J,  
743 Tosetti N, Dubrot J, Emre Y, Lunghi M, Coppens I, Yamamoto M, Sojka D, Pino P,  
744 Soldati-Favre D. 2015. Fundamental Roles of the Golgi-Associated *Toxoplasma* Aspartyl  
745 Protease, ASP5, at the Host-Parasite Interface. PLoS Pathog 11:e1005211.
- 746 28. Curt-Varesano A, Braun L, Ranquet C, Hakimi MA, Bougdour A. 2016. The aspartyl  
747 protease TgASP5 mediates the export of the *Toxoplasma* GRA16 and GRA24 effectors  
748 into host cells. Cell Microbiol 18:151-67.
- 749 29. Franco M, Panas MW, Marino ND, Lee MC, Buchholz KR, Kelly FD, Bednarski JJ,  
750 Sleckman BP, Pourmand N, Boothroyd JC. 2016. A Novel Secreted Protein, MYR1, Is  
751 Central to *Toxoplasma's* Manipulation of Host Cells. MBio 7:e02231-15.
- 752 30. Carruthers VB, Hakansson S, Giddings OK, Sibley LD. 2000. *Toxoplasma gondii* uses  
753 sulfated proteoglycans for substrate and host cell attachment. Infect Immun 68:4005-11.
- 754 31. Minot S, Melo MB, Li F, Lu D, Niedelman W, Levine SS, Saeij JP. 2012. Admixture and  
755 recombination among *Toxoplasma gondii* lineages explain global genome diversity. Proc  
756 Natl Acad Sci U S A 109:13458-63.
- 757 32. Nadipuram SM, Kim EW, Vashisht AA, Lin AH, Bell HN, Coppens I, Wohlschlegel JA,  
758 Bradley PJ. 2016. In Vivo Biotinylation of the *Toxoplasma* Parasitophorous Vacuole  
759 Reveals Novel Dense Granule Proteins Important for Parasite Growth and Pathogenesis.  
760 MBio 7.
- 761 33. Gold DA, Kaplan AD, Lis A, Bett GC, Rosowski EE, Cirelli KM, Bougdour A, Sidik  
762 SM, Beck JR, Lourido S, Egea PF, Bradley PJ, Hakimi MA, Rasmusson RL, Saeij JP.  
763 2015. The *Toxoplasma* Dense Granule Proteins GRA17 and GRA23 Mediate the

- 764 Movement of Small Molecules between the Host and the Parasitophorous Vacuole. Cell  
765 Host Microbe 17:642-52.
- 766 34. Sidik SM, Huet D, Ganesan SM, Huynh MH, Wang T, Nasamu AS, Thiru P, Saeij JPJ,  
767 Carruthers VB, Niles JC, Lourido S. 2016. A Genome-wide CRISPR Screen in  
768 *Toxoplasma* Identifies Essential Apicomplexan Genes. Cell 166:1423-1435 e12.
- 769 35. Burg JL, Grover CM, Pouletty P, Boothroyd JC. 1989. Direct and sensitive detection of a  
770 pathogenic protozoan, *Toxoplasma gondii*, by polymerase chain reaction. J Clin  
771 Microbiol 27:1787-92.
- 772 36. Ma JS, Sasai M, Ohshima J, Lee Y, Bando H, Takeda K, Yamamoto M. 2014. Selective  
773 and strain-specific NFAT4 activation by the *Toxoplasma gondii* polymorphic dense  
774 granule protein GRA6. J Exp Med 211:2013-32.
- 775 37. Alaganan A, Fentress SJ, Tang K, Wang Q, Sibley LD. 2014. *Toxoplasma* GRA7 effector  
776 increases turnover of immunity-related GTPases and contributes to acute virulence in the  
777 mouse. Proc Natl Acad Sci U S A 111:1126-31.
- 778 38. Rosowski EE, Lu D, Julien L, Rodda L, Gaiser RA, Jensen KD, Saeij JP. 2011. Strain-  
779 specific activation of the NF-kappaB pathway by GRA15, a novel *Toxoplasma gondii*  
780 dense granule protein. J Exp Med 208:195-212.
- 781 39. Chavarria-Smith J, Mitchell PS, Ho AM, Daugherty MD, Vance RE. 2016. Functional  
782 and Evolutionary Analyses Identify Proteolysis as a General Mechanism for NLRP1  
783 Inflammasome Activation. PLoS Pathog 12:e1006052.
- 784 40. Truebestein L, Leonard TA. 2016. Coiled-coils: The long and short of it. Bioessays  
785 38:903-16.

- 786 41. Zhao Y, Yang J, Shi J, Gong YN, Lu Q, Xu H, Liu L, Shao F. 2011. The NLRC4  
787 inflammasome receptors for bacterial flagellin and type III secretion apparatus. *Nature*  
788 477:596-600.
- 789 42. He Y, Hara H, Nunez G. 2016. Mechanism and Regulation of NLRP3 Inflammasome  
790 Activation. *Trends Biochem Sci* 41:1012-1021.
- 791 43. Liao KC, Mogridge J. 2013. Activation of the Nlrp1b inflammasome by reduction of  
792 cytosolic ATP. *Infect Immun* 81:570-9.
- 793 44. Neiman-Zenevich J, Liao KC, Mogridge J. 2014. Distinct regions of NLRP1B are  
794 required to respond to anthrax lethal toxin and metabolic inhibition. *Infect Immun*  
795 82:3697-703.
- 796 45. Etheridge RD, Alaganan A, Tang K, Lou HJ, Turk BE, Sibley LD. 2014. The  
797 *Toxoplasma* pseudokinase ROP5 forms complexes with ROP18 and ROP17 kinases that  
798 synergize to control acute virulence in mice. *Cell Host Microbe* 15:537-50.
- 799 46. Lagal V, Binder EM, Huynh MH, Kafsack BF, Harris PK, Diez R, Chen D, Cole RN,  
800 Carruthers VB, Kim K. 2010. *Toxoplasma gondii* protease TgSUB1 is required for cell  
801 surface processing of micronemal adhesive complexes and efficient adhesion of  
802 tachyzoites. *Cell Microbiol* 12:1792-808.
- 803 47. Sidik SM, Hackett CG, Tran F, Westwood NJ, Lourido S. 2014. Efficient genome  
804 engineering of *Toxoplasma gondii* using CRISPR/Cas9. *PLoS One* 9:e100450.
- 805 48. Behnke MS, Khan A, Lauron EJ, Jimah JR, Wang Q, Tolia NH, Sibley LD. 2015.  
806 Rhoptry Proteins ROP5 and ROP18 Are Major Murine Virulence Factors in Genetically  
807 Divergent South American Strains of *Toxoplasma gondii*. *PLoS Genet* 11:e1005434.

808 49. Huynh MH, Rabenau KE, Harper JM, Beatty WL, Sibley LD, Carruthers VB. 2003.  
809 Rapid invasion of host cells by *Toxoplasma* requires secretion of the MIC2-M2AP  
810 adhesive protein complex. EMBO J 22:2082-90.

811

## 812 **Table and figure legends**

813 **Table 1. List of all identified non-synonymous mutations.** “Ref” is reference nucleotide(s) in  
814 WT strain (GT1 v9.0). “Sub” is nucleotide variant(s). “Mut” is mutant clone number.

815

816 **Figure 1. The NLRP3 inflammasome is dispensable for *Toxoplasma*-induced Lewis rat  
817 macrophage cell death and IL-1 $\beta$  secretion.**

818 Lewis rat BMDMs with or without pre-treatment of either 50  $\mu$ M of VX765 or 10  $\mu$ M of  
819 MCC950 for 2 hours were infection with *Toxoplasma* type I (RH) parasites (MOI = 0.5) for 24  
820 hours. Macrophage viability was measured via 3-(4,5-dimethylthiazol-3-yl)-5-(3-  
821 carboxymethoxyphenyl)-2-(4-sulfophenyl)-2H-tetrazolium) (MTS) assay. Data are displayed as  
822 the paired scatterplots (left,  $n = 3$ ;  $*p < 0.05$ , ns, not significant; student’s t-test). The right  
823 scatterplots are showing the cell viability difference between infected BMDMs with and without  
824 treatment in each paired experiment. Horizontal bars represent the median cell viability  
825 difference.

826

827 **Figure 2. *Toxoplasma*-induced Lewis rat macrophage cell death is ASP5- but not MYR1-  
828 dependent.**

829 (A) Lewis rat BMDMs were infected with WT parasites, ASP5 knockout parasites ( $\Delta asp5$ ) or  
830 ASP5 knockout parasites complemented with a Ty-tagged copy of ASP5 (ASP5-Ty) (MOI = 1)

831 for 24 hours. Macrophage viability was measured via MTS assay. Data are displayed as the  
832 paired scatterplots (left,  $n = 4$ ;  $*p < 0.05$ ; student's t-test). The right scatterplots are showing the  
833 cell viability difference between indicated strains with WT parasites in each paired experiment.  
834 Horizontal bars represent the median cell viability difference.

835 (B) Lewis rat BMDMs were infected with WT parasites or two independent clones of MYR1  
836 knockout parasites ( $\Delta myr1$  #1 and  $\Delta myr1$  #2) (MOI = 1) for 24 hours. Macrophage viability was  
837 measured via MTS assay. Data are displayed as the paired scatterplots (left,  $n = 4$  for WT and  
838  $\Delta myr1$  #1,  $n = 3$  for  $\Delta myr1$  #2; ns, not significant; student's t-test). The right scatterplots show  
839 the cell viability difference between  $\Delta myr1$  parasites and WT parasites in each paired experiment.  
840 Horizontal bars represent the median cell viability difference.

841

842 **Figure 3. Isolation of *Toxoplasma* mutants that do not induce Lewis rat macrophage cell**  
843 **death.**

844 (A) Schematic of mutagenesis screen. DS is Dextran Sulfate, BMDMs is Bone marrow-derived  
845 macrophages.

846 (B) Lewis rat BMDMs were infected with indicated mutagenized parasites (MOI = 1) for 24  
847 hours. Macrophage viability was measured via MTS assay. Data are displayed as the column ( $n$   
848 = 1).

849 (C) Lewis rat BMDMs were infected with WT parasites or independent mutant strains isolated  
850 from the pool of mutagenized parasites (Mutant clone #1, #2 and #3) (MOI = 1) for 24 hours.  
851 Macrophage viability was measured via MTS assay. Data are displayed as the paired scatterplots  
852 (left,  $n \geq 8$  for WT,  $n = 11$  for mutant #1,  $n = 17$  for mutant #2,  $n = 8$  for mutant #3;  $***p <$   
853  $0.001$ ,  $****p < 0.0001$ ; student's t-test). The right scatterplots are showing the cell viability

854 difference between indicated mutant strains and WT parasites in each paired experiment.

855 Horizontal bars represent the median cell viability difference.

856 (D) Lewis rat BMDMs were infected with the strains used in (C) (MOI = 0.5) for 24 hours.

857 Number of parasites per vacuole was quantified by microscopy. Between 100-120 vacuoles were

858 counted per experiment. Data are displayed as the average values ( $n = 4$ ; error bars, +SD; \*\*\*\* $p$

859  $< 0.0001$ ; two-way ANOVA comparing mutants to WT).

860 (E) Western blot probing for IL-1 $\beta$  on concentrated (20x) supernatants of LPS-primed (100

861 ng/ml, 2 hours) Lewis rat BMDMs infected with the strains used in (C) (MOI = 1) for 24 hours.

862 Image is representative of two experiments, pro-IL-1 $\beta$  is 37 kD, active IL-1 $\beta$  is 17 kD, aspecific

863 band is represented by asterisk and indicates similar loading of samples.

864

865 **Figure 4. Three genes are individually required to induce cell death in Lewis rat BMDMs.**

866 (A) List of genes containing non-synonymous polymorphisms that fulfill candidate gene criteria

867 in isolated mutants.

868 (B) Lewis rat BMDMs were infected with WT parasites or the parasites in which

869 *TGGT1\_248260*, *SUB1*, *TGGT1\_203040* or *ROP17* was knocked out ( $\Delta$ *TGGT1\_248260*,  $\Delta$ *sub1*,

870  $\Delta$ *TGGT1\_203040* or  $\Delta$ *rop17*) (MOI = 1) for 24 hours. Macrophage viability was measured via

871 MTS assay. Data are displayed on the left as the paired scatterplots (Left,  $n = 2$ ; ns, not

872 significant; student's t-test). The right scatterplots are showing the cell viability difference

873 between indicated knockout strains and WT parasites in each paired experiment. Horizontal bars

874 represent the median cell viability difference.

875 (C) Cell viability as assessed by MTS assay of Lewis rat BMDMs infected with WT parasites, or

876 parasites in which *GRA35*, *TGGT1\_237015* or *TGGT1\_236870* was knocked out ( $\Delta$ *gra35*,

877  $\Delta TGGT1_{237015}$  or  $\Delta TGGT1_{236870}$ ) or knockout parasites complemented with WT alleles of  
878 *GRA35*, *TGGT1\_{237015} or *TGGT1\_{236870} ( $\Delta gra35$  + *GRA35*,  $\Delta TGGT1_{237015}$  +  
879 *TGGT1\_{237015} or  $\Delta TGGT1_{236870}$  + *TGGT1\_{236870}) (MOI = 1) for 24 hours. Data are  
880 displayed on the left as the paired scatterplots (left,  $n \geq 16$  for WT,  $n = 28$  for  $\Delta gra35$ ,  $n = 7$  for  
881  $\Delta gra35$  + *GRA35*,  $n = 19$  for  $\Delta TGGT1_{237015}$ ,  $n = 2$  for  $\Delta TGGT1_{237015}$  + *TGGT1\_{237015},  
882  $n = 16$  for  $\Delta TGGT1_{236870}$ ,  $n = 4$  for  $\Delta TGGT1_{236870}$  + *TGGT1\_{236870}; \*\*\* $p < 0.001$ ,  
883 \*\*\*\* $p < 0.0001$ , ns, not significant; student's t-test). The right scatterplots are showing the cell  
884 viability difference between indicated strains with WT parasites in each paired experiment.  
885 Horizontal bars represent the median cell viability difference.******

886 (D) Number of parasites per vacuole were measured in Lewis rat BMDMs infected with the  
887 strains used in (C) (MOI = 0.5) at 24 hours post-infection. Between 100-120 vacuoles were  
888 counted per experiment. Data are displayed as the average values ( $n = 5$  for WT and  
889  $\Delta TGGT1_{237015}$ ,  $n = 4$  for  $\Delta gra35$ ,  $n = 3$  for  $\Delta TGGT1_{236870}$ ,  $n = 2$  for all the  
890 complementation strains; error bars, +SD; \*\* $p < 0.01$ , \*\*\* $p < 0.001$ , \*\*\*\* $p < 0.0001$ ; two-way  
891 ANOVA multiple comparisons).

892 (E) Lewis rat BMDMs were infected with type II WT parasites or type II parasites in which  
893 *GRA35*, *TGME49\_{237015} or *TGME49\_{236870} was knocked out ( $\Delta gra35_{II}$ ,  $\Delta TGME49_{237015}$   
894 or  $\Delta TGME49_{236870}$ ) (MOI = 1) for 24 hours. Macrophage viability was measured via MTS  
895 assay. Data are displayed as the paired scatterplots (left,  $n \geq 4$  for WT,  $n = 5$  for  $\Delta gra35_{II}$  and  
896  $\Delta TGME49_{237015}$ ,  $n = 4$  for  $\Delta TGME49_{236870}$ ; \*\* $p < 0.01$ , \*\*\* $p < 0.001$ , \*\*\*\* $p < 0.0001$ ;  
897 student's t-test). The right scatterplots are showing the cell viability difference between indicated  
898 knockout strains with WT parasites in each paired experiment. Horizontal bars represent the  
899 median cell viability difference.**



900

901 **Figure 5. *TGGT1\_236870* and *TGGT1\_237015* encode for novel dense granule proteins,**  
902 **GRA42 and GRA43.**

903 (A) Strains individually knocked out in each gene were generated using CRISPR/Cas9 and  
904 complemented with an HA-tagged WT version of gene. HFFs were infected with HA-expressing  
905 parasites for 24 hours. Extracellular parasites were removed and washed with PBS prior to lysing  
906 (“Extra”). Remaining infected cells were lysed (“Intra”). SAG-1 is used as parasite loading  
907 control. Predicted sizes: GRA35, 40.3 kD; GRA42, 29.3 kD; GRA43, 23.8 kD. Image is  
908 representative of two independent experiments.

909 (B) Extracellular parasites expressing HA-tagged GRA35, GRA42 or GRA43 were fixed,  
910 permeabilized, and subjected to Immunofluorescent assay with antibodies indicated. The images  
911 were taken at identical exposure times for each channel (scale bar = 2  $\mu$ m). Image is  
912 representative of two independent experiments.

913

914 **Figure 6. GRA35, GRA42 and GRA43 restore the mutant phenotype, and are required for**  
915 **inflammasome activation.**

916 (A) Lewis rat BMDMs were infected with WT parasites, independent mutant strains isolated  
917 from the pool of mutagenized parasites (Mutant clone #1, #2 and #3) or the mutant strains  
918 complemented with WT alleles of *GRA42*, *GRA43* or *GRA35* (Mutant #1 + *GRA42*, Mutant #2 +  
919 *GRA43*, Mutant #3 + *GRA35*) (MOI = 1) for 24 hours. Macrophage viability was measured via  
920 MTS assay. Data are displayed on the left as the paired scatterplots (left,  $n \geq 8$  for WT,  $n = 11$   
921 for mutant #1,  $n = 17$  for mutant #2,  $n = 8$  for mutant #3,  $n = 2$  for mutant #1 + *GRA42* and  
922 mutant #3 + *GRA35*,  $n = 4$  for mutant #2 + *GRA43*; \*\* $p < 0.01$ , \*\*\* $p < 0.001$ , \*\*\*\* $p < 0.0001$ ;

923 student's t-test). The right scatterplots are showing the cell viability difference between indicated  
924 strains and WT parasites in each paired experiment. Horizontal bars represent the median cell  
925 viability difference.

926 **(B)** Number of parasites per vacuole were measured in Lewis rat BMDMs infected with the  
927 strains used in **(A)** (MOI = 0.5) at 24 hours post-infection. Between 100-120 vacuoles were  
928 counted per experiment. Data are displayed as the average values ( $n = 4$  for WT and mutant #1,  
929 #2 and #3,  $n = 2$  for mutant #1 + *GRA42*, mutant #2 + *GRA43* and mutant #3 + *GRA35*; error  
930 bars, +SD; \*\*\*\* $p < 0.0001$ ; two-way ANOVA multiple comparisons).

931 **(C)** Western blot of IL-1 $\beta$  on concentrated supernatants (20x) BMDMs primed with LPS  
932 (100ng/ml, 2 hours) infected with the strains used in **(A)** (MOI =1, 24 hours). Image is  
933 representative of two independent experiments.

934

935 **Figure 7. GRA42 and GRA43 influence the localization of GRA35, as well as GRA17, to the**  
936 **PVM.**

937 **(A)** Lewis rat BMDMs were infected with WT parasites, or parasites in which *GRA35*, *GRA42* or  
938 *GRA43* was knocked out ( $\Delta gra35$ ,  $\Delta gra42$  or  $\Delta gra43$ ), or parasites containing a doubly  
939 knockout of *GRA35*, *GRA42* or *GRA43* ( $\Delta gra35\Delta gra42$ ,  $\Delta gra35\Delta gra43$  or  $\Delta gra42\Delta gra43$ ) or  
940 triple knockout parasites ( $\Delta gra35\Delta gra42\Delta gra43$ ) (MOI = 1) for 24 hours. Macrophage viability  
941 was measured via MTS assay. Data are displayed as the paired scatterplots (left,  $n = 4$ ; all  
942 knockout strains vs. WT, \*\* $p < 0.01$ , \*\*\* $p < 0.001$ , \*\*\*\* $p < 0.0001$ ; student's t-test). The right  
943 scatterplots are showing the cell viability difference between indicated strains and WT parasites  
944 in each paired experiment. Horizontal bars represent the median cell viability difference (ns, not  
945 significant; one-way ANOVA with Kruskal-Wallis test).

946 (B) HFFs were infected with WT parasites, parasites in which *GRA35*, *GRA42*, *GRA43* or *ASP5*  
947 was knocked out ( $\Delta gra35$ ,  $\Delta gra42$ ,  $\Delta gra43$  or  $\Delta asp5$ ) and that transiently expressed GRA35-HA  
948 (left), GRA42-HA (middle) or GRA43-HA (right). The parasites were fixed and stained with  
949 antibodies against the HA epitope (red) and SAG1 (green). Transfected parasites were GFP  
950 positive. Images were taken at identical exposure times for each channel (scale bar = 5  $\mu$ m).  
951 Image is representative of two independent experiments.

952 (C) HFFs were infected with WT parasites or the parasites in which *GRA42* or *GRA43* was  
953 knocked out ( $\Delta gra42$  or  $\Delta gra43$ ) and that transiently expressed GRA17-HA (left) or GRA23-HA  
954 (right), fixed and stained with antibodies against SAG1 (green) and the HA epitope (red).  
955 Transfected parasites were GFP positive. The images were taken at identical exposure times for  
956 each channel (scale bar = 5  $\mu$ m). Image is representative of two independent experiments.

957 (D) Localization of GRA17 or GRA23 (C) in at least 60 vacuoles containing 4 or more parasites  
958 was observed and scored as PVM localization, partial PVM localization or PV lumen  
959 localization. Data are displayed as the average values ( $n = 2$ ; error bars, +SD; \*\*\* $p < 0.001$ ,  
960 \*\*\*\* $p < 0.0001$ ; two-way ANOVA comparing mutants to WT).

961

962 **Figure 8. Lewis rat NLRP1 does not interact with *Toxoplasma* GRA35 in co-transfected**  
963 **HEK293T cells.**

964 HEK293T cells were co-transfected with pcDNA3.1-GRA35-HA and pCMV-FLAG-NLRP1  
965 (expressing Lewis rat variant of Nlrp1) at the ratio of 1:1. 30 hours after transfection, cells were  
966 lysed in IP-lysis buffer (50 mM Tris pH 7.4, 150 mM NaCl, 0.5% Triton X-100) containing 1  $\times$   
967 protease inhibitor and 1 mM PMSF. The indicated portion of cell lysates was incubated with  
968 protein G magnetic beads pre-bound with rat anti-HA or mouse anti-FLAG antibody at 4  $^{\circ}$ C for

969 1 hour with rotation. After washing with IP-lysis buffer, proteins bound to the beads were  
970 solubilized in SDS-loading buffer by boiling for 5 minutes, and examined by Western blot  
971 analysis using indicated antibody. Image is representative of two independent experiments with  
972 similar outcomes.

973

974 **Figure 9. Parasites lacking GRA35, GRA42 and GRA43 do not establish a chronic infection**  
975 **in Lewis rats.**

976 (A) Number of brain cysts from each rat was determined by FITC-DBA staining at 60 days post-  
977 infection. Each plot represents number of brain cysts of individual rat ( $n = 3$ ;  $*p < 0.05$ ; one-way  
978 ANOVA with Kruskal-Wallis test).

979 (B) The presence of *Toxoplasma* genomic DNA in the brain of infected rats was detected by  
980 diagnostic PCR targeting the multi-copy *BI* gene. As an internal control, rat actin was used to  
981 check the quality of isolated DNA. Image is representative of two independent experiments.

982 (C) The rat serum was obtained at 60 days post-infection. The anti-*Toxoplasma* IgG titers were  
983 quantified by ELISA. Titers were defined as the dilution which gave an OD<sub>405</sub> reading at least  
984 two-fold higher than the mean background in uninfected rat serum. Results are presented as  
985 mean values  $\pm$  SD obtained from individual infected rats ( $n = 3$ ).

986

987 **Supplementary Table 1. Sequences of primers used in this study.**

988 HA-tag sequence is bolded. Restriction enzyme sites are underlined.

989

990 **Supplementary Figure 1. Neither Caspase-1 inhibitor nor NLRP3 inflammasome inhibitor**  
991 **affect parasite invasion.**

992 (A) Lewis rat BMDMs ( $1 \times 10^5$ ) were stimulated with or without 50  $\mu$ M of VX765 or 10  $\mu$ M of  
993 MCC950 for 2 hours followed by infection with  $1 \times 10^5$  of *Toxoplasma* type I (RH) parasites for  
994 30 minutes. Quantification of the invading and invaded parasites per host nucleus. Data are  
995 displayed as the average values with scatterplots for each independent experiment ( $n = 3$ ; error  
996 bars,  $\pm$ SD; ns, not significant; one-way ANOVA with Kruskal-Wallis test).

997 (B) Confluent HFFs were stimulated with or without VX765 (50  $\mu$ M) or MCC950 (10  $\mu$ M)  
998 followed by infection with parasites for 4 days. The area of at least 40 plaques per experiment  
999 was measured. Data are displayed as the average values with scatterplots for each independent  
1000 experiment ( $n = 2$ ; error bars,  $\pm$ SD; ns, not significant; one-way ANOVA with Kruskal-Wallis  
1001 test).

1002 (C) Lewis rat BMDMs primed with 100 ng/ml of LPS for 2 hours were treated with or without  
1003 10  $\mu$ M of MCC950 for 2 hours followed by stimulating with or without 10  $\mu$ M of Nigericin for 2  
1004 hours. Macrophage viability was measured via MTS assay. Data are displayed as the paired  
1005 scatterplots ( $n = 3$ ;  $*p < 0.05$ ,  $**p < 0.01$ , ns, not significant; student's t-test).

1006 (D) IL-1 $\beta$  secretion was measured using ELISA on the cell supernatants from (C). Data are  
1007 displayed as the paired scatterplots ( $n = 3$ ;  $*p < 0.05$ , ns, not significant; student's t-test).

1008

## 1009 **Supplementary Figure 2. PCR confirming knockout of candidate genes.**

1010 (A) Schematic diagram depicting the genomic loci of the genes of interest (GOI) (top) and the  
1011 CRISPR/Cas9-targeting site (red box), linearized pTKOatt plasmid containing HXGPRT  
1012 selection cassettes (middle) was used as repair template to disrupt GOI loci (bottom) after  
1013 mycophenolic acid and xanthine selection. P1 and P2 refer to primers used for checking locus  
1014 disruption.

1015 (B) Schematic diagram depicting the strategy used for making double/triple knockout. The  
1016 *GRA42* or/and *GRA43* locus in  $\Delta gra35$  parasites was disrupted by CRISPR/Cas9 cleavage and  
1017 linearized pLoxp-DHFR-mCherry plasmid containing DHFR-TS selection cassette was used for  
1018 NHEJ repair of the double stranded break. After pyrimethamine selection and limiting dilution,  
1019 single clones with DHFR-mCherry integrated into the *GRA42* locus and an intact *GRA43* locus  
1020 were used as the  $\Delta gra35\Delta gra42$  strain; single clones with an intact *GRA42* locus and DHFR-  
1021 mCherry integrated into the *GRA43* locus were used as the  $\Delta gra35\Delta gra43$  strain; single clones  
1022 with DHFR-mCherry integrated into both loci were used as triple knockout strain.

1023 (C) Genomic DNA was isolated from clones and used as template. Knockout was determined by  
1024 failure to amplify the gene of interest using P1 and P2 as primers. DNA quality was assessed by  
1025 amplifying *TGGT1\_309160* (i and vi, for  $\Delta myr1$  and single, double and triple knockout of  
1026 *GRA35*, *GRA42* and *GRA43*), *B1* gene (ii, for  $\Delta TGGT1_248260$ ) or *GRA35* (iii and iv, for  
1027  $\Delta TGGT1_203040$  and  $\Delta rop17$ ).

1028

1029 **Supplementary Figure 3. Predicted structure and synonymous non-synonymous analysis of**  
1030 ***GRA35*, *TGGT1\_236870* and *TGGT1\_237015*.**

1031 (A) PSIPRED was used for secondary structure prediction (Jones 1999). Red stars indicate the  
1032 mutation site in amino acid sequence of mutant #1, #2 and #3. Blue stars indicate the *GRA35*  
1033 mutation site in amino acid sequence of mutant #4. Signal peptide, grey box;  $\alpha$ -helices, green  
1034 box. TmHMM2.0 was used for transmembrane domain (TM) prediction (Krogh et al. 2001). TM,  
1035 blue box. Coiled-coil domain was analyzed using  
1036 [http://www.ch.embnet.org/software/COILS\\_form.html](http://www.ch.embnet.org/software/COILS_form.html) (Lupas, A., 1991). Coiled-coil region,  
1037 yellow box.

1038 **(B, C and D)** SNAP was used for synonymous non-synonymous analysis  
1039 (<https://www.hiv.lanl.gov/content/sequence/SNAP/SNAP.html>) (Korber B. 2000). Coding  
1040 sequence of *GRA35* **(B)**, *TGGT1\_236870* **(C)** and *TGGT1\_237015* **(D)** from 64 strains (ToxoDB  
1041 29 release) were analyzed using SNAP V2.1.1.

1042

1043 **Supplementary Figure 4. Mutant #4 does not induce cell death in Lewis rat macrophages.**

1044 Lewis rat BMDMs were infected with WT parasites or mutant clone #4, which was isolated from  
1045 the pool of mutagenized parasites (MOI = 1) for 24 hours. Macrophage viability was measured  
1046 via MTS assay. Data are displayed as the paired scatterplots (left,  $n = 4$ ;  $**p < 0.01$ ; student's t-  
1047 test). The right scatterplots are showing the cell viability difference between mutant #4 with WT  
1048 parasites in each paired experiment. Horizontal bars represent the median cell viability difference.

1049

1050 **Supplementary Figure 5. GRA35, TGGT1\_236870 and TGGT1\_237015 have orthologues**  
1051 **in *Hammondia*, *Neospora* and *Besnoitia*.**

1052 Alignments of primary peptide sequences using PRALINE.

1053 **(A)** Alignment of GRA35 from Type I, II and III *Toxoplasma gondii*, *Hammondia hammondi*  
1054 HHA\_226380, *Neospora caninum* NCLIV\_046580 and NCLIV\_047520, *Besnoitia besnoiti*  
1055 BESB\_060230 and BESB\_061290, and *Toxoplasma gondii* TGGT1\_225160, GRA36 and  
1056 TGGT1\_257970.

1057 **(B)** Alignment of *Toxoplasma* TGGT1\_236870, TGME49\_236870 and TGVEG\_236870,  
1058 *Hammondia* HHA\_236870, *Neospora* NCLIV\_050780 and *Besnoitia besnoiti* BESB\_036500.

1059 (C) Alignment of *Toxoplasma* TGGT1\_237015, TGME49\_237015 and TGVEG\_237015,  
1060 *Hammondia* HHA\_237015 and *Neospora caninum* NCLIV\_050915 and *Besnoitia besnoiti*  
1061 BESB\_036360.

1062

1063 **Supplementary Figure 6. *GRA35* gene family members are not involved in *Toxoplasma***  
1064 **induced cell death in Lewis rat BMDMs.**

1065 (A) Schematic diagram depicting the genomic loci of GOI (top) and the CRISPR/Cas9-targeting  
1066 site, linearized pLoxp-DHFR-mCherry plasmid containing DHFR-TS selection cassettes (middle)  
1067 was used as a repair template to disrupt GOI loci (bottom) after pyrimethamine selection. P1 and  
1068 P2 refer to primers used for checking loci disruption; P1 and P3 refer to primers used for  
1069 checking repair template integration.

1070 (B) PCR confirming individual knockout of *GRA35* gene family members with indicated  
1071 primers. Genomic DNA isolated from each knockout parasites was used as template.

1072 (C) Lewis rat BMDMs were infected with WT parasites or the parasites in which *GRA35*,  
1073 *TGGT1\_225160*, *GRA36* or *TGGT1\_257970* was knocked out ( $\Delta gra35$ ,  $\Delta TGGT1_225160$ ,  
1074  $\Delta gra36$  or  $\Delta TGGT1_257970$ ) (MOI = 1) for 24 hours. Macrophage viability was measured via  
1075 MTS assay. Data are displayed as the paired scatterplots (left,  $n = 3$ ; all knockout strains vs. WT ,  
1076  $**p < 0.01$ , ns, not significant; student's t-test). The right scatterplots are showing the cell  
1077 viability difference between indicated strains and WT parasites in each paired experiment.  
1078 Horizontal bars represent the median cell viability difference.

1079

1080 **Supplementary Figure 7. *GRA35*, *GRA42* or *GRA43* mutants exhibit normal growth *in***  
1081 ***vitro*.**



1082 (A) Confluent Brown Norway rat immortalized fibroblasts infected with type II WT parasites  
1083 (ME49-RFP) or the type II parasites in which *GRA35*, *GRA42* or *GRA43* was knocked out  
1084 (ME49-RFP $\Delta$ *gra35*, ME49-RFP $\Delta$ *gra42* or ME49-RFP $\Delta$ *gra43*) for 7 days. The area of at least  
1085 40 plaques per experiment was measured. Data are displayed as the average values with  
1086 scatterplots for each independent experiment ( $n = 3$ ; error bars,  $\pm$ SD; ns, not significant; one-way  
1087 ANOVA with Kruskal-Wallis test).

1088 (B) F344 rat BMDMs were infected with WT parasites, parasites in which *GRA35*, *GRA42* or  
1089 *GRA43* was knocked out ( $\Delta$ *gra35*,  $\Delta$ *gra42* or  $\Delta$ *gra43*) or knockout parasites complemented with  
1090 WT alleles of *GRA35*, *GRA42* or *GRA43* ( $\Delta$ *gra35* + *GRA35*,  $\Delta$ *gra42* + *GRA42* or  $\Delta$ *gra43* +  
1091 *GRA43*) (MOI = 1) for 24 hours. Macrophage viability was measured via MTS assay. Data are  
1092 displayed as the grouped column combined with Lewis rat cell viability data showed at Figure  
1093 4C. Red indicates the average cell viability (+ SD) of Lewis rat BMDMs infected with indicated  
1094 parasites; blue indicates the average cell viability (+ SD) of F344 rat BMDMs infected with  
1095 indicated parasites ( $n = 3$ ).

1096 (C) IFAs were performed on type II WT parasites (ME49-RFP) or the type II parasites in which  
1097 *GRA35*, *GRA42* or *GRA43* was knocked out (ME49-RFP $\Delta$ *gra35*, ME49-RFP $\Delta$ *gra42* or ME49-  
1098 RFP $\Delta$ *gra43*) as developing bradyzoite stages (for 3 days in alkaline pH 8.2). FITC-conjugated  
1099 DBA was used to visualize the cyst wall. Images were taken at identical exposure times for each  
1100 channel (scale bar = 10  $\mu$ m). Image is representative of two independent experiments.

1101  
1102 **Supplementary Figure 8. *Neospora caninum* is able to induce cell death in Lewis rat**  
1103 **macrophages.** Lewis BMDMs primed with LPS (100 ng/ml, 2 hours) or left untreated and  
1104 infected with indicated parasites (*Toxoplasma*, RH; *Neospora*, NC-1) at MOI =1 for 24 hours.

1105 (A) Cell viability was measured using an MTS assay.

1106 (B) IL-1 $\beta$  secretion was measured using ELISA on cell supernatants.

1107 Data shown are the average of two experiments, Error bars, +SD.

1108

**Table 1. List of all identified non-synonymous mutations.** “Ref” is reference nucleotide(s) in WT strain (GT1 v9.0). “Sub” is nucleotide variant(s). “Mut” is mutant clone number.

| Chromosome    | Position | Ref | Sub | Codon Change | AA Change | Gene         | Mut No. |
|---------------|----------|-----|-----|--------------|-----------|--------------|---------|
| TGGT1_chrXII  | 3698939  | C   | T   | Cgt/Tgt      | R/C       | TGGT1_248260 | 1       |
| TGGT1_chrXI   | 4323464  | A   | G   | cTc/cCc      | L/P       | TGGT1_314875 | 1       |
| TGGT1_chrX    | 5454719  | A   | T   | Tga/Aga      | */R       | TGGT1_236870 | 1       |
| TGGT1_chrVIII | 3546892  | A   | G   | Aca/Gca      | T/A       | TGGT1_273510 | 1       |
| TGGT1_chrVIIb | 258249   | C   | G   | Ccg/Gcg      | P/A       | TGGT1_263360 | 1       |
| TGGT1_chrVIIb | 1300287  | A   | G   | tTc/tCc      | F/S       | TGGT1_262825 | 1       |
| TGGT1_chrVIIb | 4053654  | G   | C   | Ccg/Gcg      | P/A       | TGGT1_257500 | 1       |
| TGGT1_chrVIIa | 683027   | A   | G   | Ttc/Ctc      | F/L       | TGGT1_206550 | 1       |
| TGGT1_chrVIIa | 1666878  | A   | G   | tTg/tCg      | L/S       | TGGT1_204310 | 1       |
| TGGT1_chrV    | 2683109  | A   | C   | Ttg/Gtg      | L/V       | TGGT1_284040 | 1       |
| TGGT1_chrIX   | 1745808  | G   | A   | cCc/cTc      | P/L       | TGGT1_264890 | 1       |
| TGGT1_chrIX   | 3803976  | T   | C   | Tct/Cct      | S/P       | TGGT1_290960 | 1       |
| TGGT1_chrIII  | 527809   | A   | T   | aaA/aaT      | K/N       | TGGT1_252395 | 1       |
| TGGT1_chrIII  | 1241431  | C   | T   | Gac/Aac      | D/N       | TGGT1_253870 | 1       |
| TGGT1_chrIb   | 814454   | A   | T   | cTg/cAg      | L/Q       | TGGT1_208580 | 1       |
| TGGT1_chrVIIa | 2153702  | GGA | GA  | gag/aga      | E/R       | TGGT1_204050 | 1       |
| TGGT1_chrIV   | 2235861  | G   | A   | cGa/cAa      | R/Q       | TGGT1_301250 | 2       |
| TGGT1_chrVIIa | 2964132  | C   | G   | ttG/ttC      | L/F       | TGGT1_203040 | 2       |
| TGGT1_chrVI   | 290424   | T   | C   | Aaa/Gaa      | K/E       | TGGT1_239130 | 2       |
| TGGT1_chrVI   | 3356628  | G   | C   | Gga/Cga      | G/R       | TGGT1_243635 | 2       |
| TGGT1_chrV    | 121175   | A   | G   | aTc/aCc      | I/T       | TGGT1_220175 | 2       |
| TGGT1_chrXII  | 5959927  | A   | C   | cAt/cCt      | H/P       | TGGT1_278518 | 2       |
| TGGT1_chrVIII | 2061823  | T   | C   | Agt/Ggt      | S/G       | TGGT1_231410 | 2       |
| TGGT1_chrVIIb | 730342   | C   | T   | Cgt/Tgt      | R/C       | TGGT1_264140 | 2       |
| TGGT1_chrVIIb | 2573674  | G   | A   | cCa/cTa      | P/L       | TGGT1_260450 | 2       |
| TGGT1_chrVIIb | 3451345  | A   | G   | gAt/gGt      | D/G       | TGGT1_258580 | 2       |
| TGGT1_chrX    | 5567109  | C   | T   | tGg/tAg      | W/*       | TGGT1_237015 | 2       |
| TGGT1_chrIX   | 2023395  | T   | C   | gAa/gGa      | E/G       | TGGT1_264472 | 3       |
| TGGT1_chrV    | 1043175  | T   | C   | Acg/Gcg      | T/A       | TGGT1_213610 | 3       |
| TGGT1_chrVI   | 1514625  | A   | T   | gAt/gTt      | D/V       | TGGT1_240960 | 3       |
| TGGT1_chrVI   | 674303   | C   | T   | aGa/aAa      | R/K       | TGGT1_239700 | 3       |
| TGGT1_chrVIIa | 1197377  | C   | G   | Gcc/Ccc      | A/P       | TGGT1_205160 | 3       |
| TGGT1_chrVIII | 2566377  | G   | T   | gaG/gaT      | E/D       | TGGT1_233120 | 3       |
| TGGT1_chrX    | 1583637  | A   | T   | Aaa/Taa      | K/*       | TGGT1_226380 | 3       |
| TGGT1_chrX    | 3027043  | T   | A   | Agc/Tgc      | S/C       | TGGT1_224280 | 3       |
| TGGT1_chrX    | 401396   | T   | C   | Agt/Ggt      | S/G       | TGGT1_228210 | 3       |
| TGGT1_chrXI   | 2517037  | A   | G   | cAc/cGc      | H/R       | TGGT1_312140 | 3       |
| TGGT1_chrXII  | 1102624  | T   | C   | Aag/Gag      | K/E       | TGGT1_219070 | 3       |
| TGGT1_chrXII  | 6691803  | T   | C   | aAg/aGg      | K/R       | TGGT1_277030 | 3       |

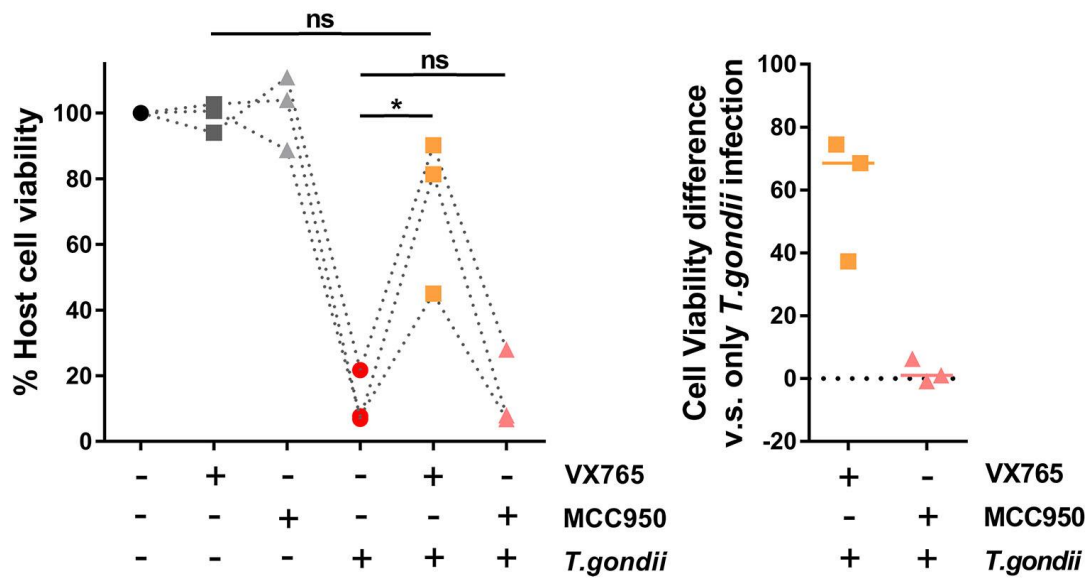

**Figure 1. The NLRP3 inflammasome is dispensable for *Toxoplasma*-induced Lewis rat macrophage cell death and IL-1 $\beta$  secretion.**

Lewis rat BMDMs with or without pre-treatment of either 50  $\mu$ M of VX765 or 10  $\mu$ M of MCC950 for 2 hours were infection with *Toxoplasma* type I (RH) parasites (MOI = 0.5) for 24 hours. Macrophage viability was measured via 3-(4,5-dimethylthiazol-3-yl)-5-(3-carboxymethoxyphenyl)-2-(4-sulfophenyl)-2H-tetrazolium (MTS) assay. Data are displayed as the paired scatterplots (left,  $n = 3$ ; \* $p < 0.05$ , ns, not significant; student's t-test). The right scatterplots are showing the cell viability difference between infected BMDMs with and without treatment in each paired experiment. Horizontal bars represent the median cell viability difference.

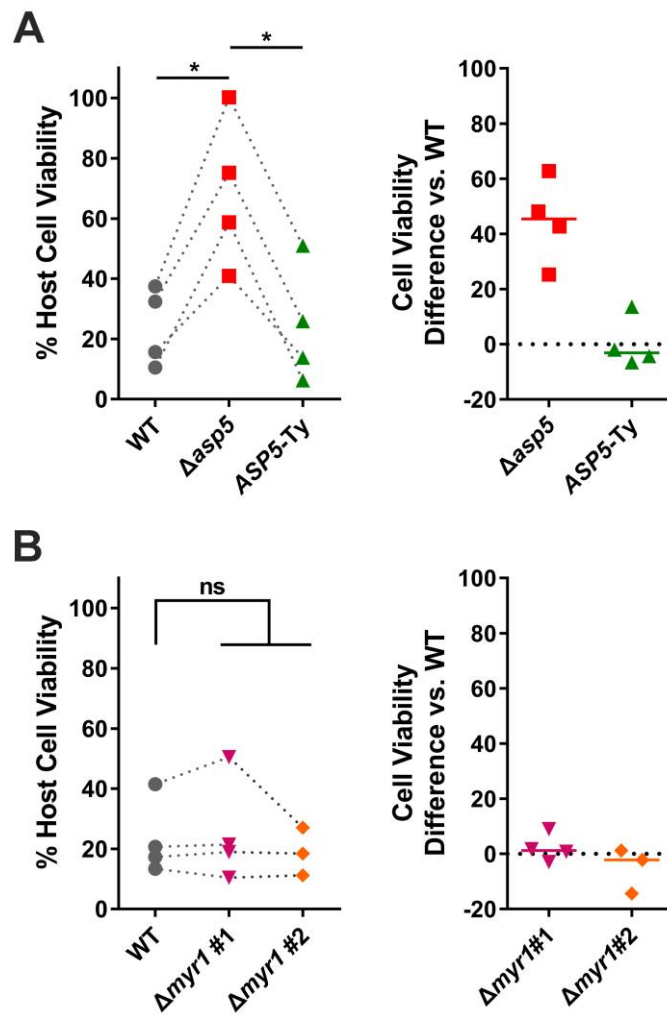

**Figure 2. *Toxoplasma*-induced Lewis rat macrophage cell death is ASP5- but not MYR1-dependent.**

(A) Lewis rat BMDMs were infected with WT parasites, ASP5 knockout parasites ( $\Delta asp5$ ) or ASP5 knockout parasites complemented with a Ty-tagged copy of ASP5 (ASP5-Ty) (MOI = 1) for 24 hours. Macrophage viability was measured via MTS assay. Data are displayed as the paired scatterplots (left,  $n = 4$ ;  $*p < 0.05$ ; student's t-test). The right scatterplots are showing the cell viability difference between indicated strains with WT parasites in each paired experiment. Horizontal bars represent the median cell viability difference.

(B) Lewis rat BMDMs were infected with WT parasites or two independent clones of MYR1 knockout parasites ( $\Delta myr1$  #1 and  $\Delta myr1$  #2) (MOI = 1) for 24 hours. Macrophage viability was measured via MTS assay. Data are displayed as the paired scatterplots (left,  $n = 4$  for WT and  $\Delta myr1$  #1,  $n = 3$  for  $\Delta myr1$  #2; ns, not significant; student's t-test). The right scatterplots show the cell viability difference between  $\Delta myr1$  parasites and WT parasites in each paired experiment. Horizontal bars represent the median cell viability difference.

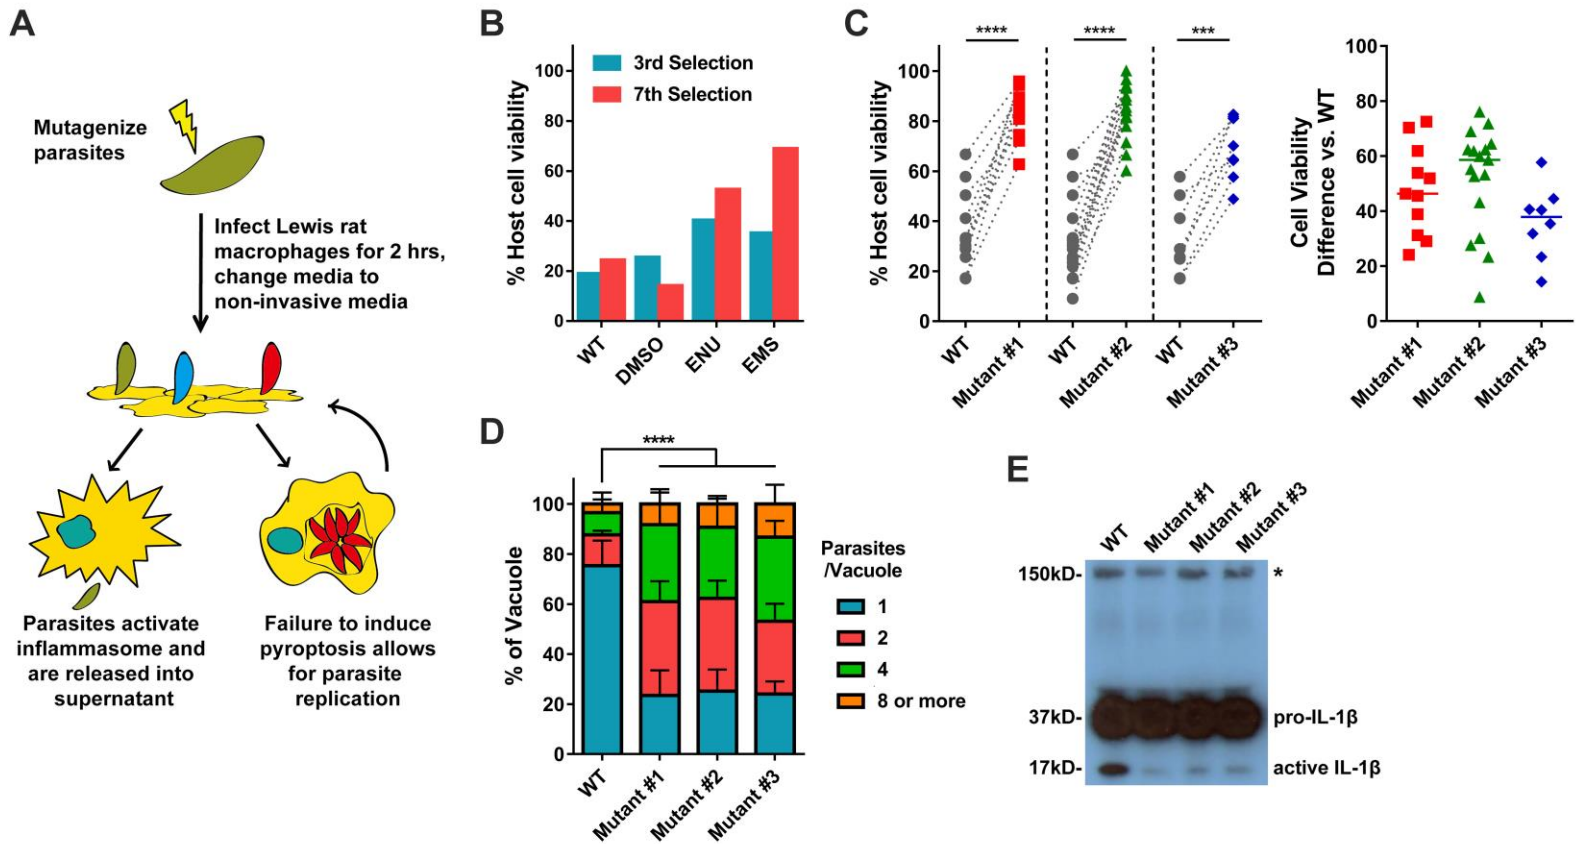

**Figure 3. Isolation of *Toxoplasma* mutants that do not induce Lewis rat macrophage cell death.**

- (A) Schematic of mutagenesis screen. DS is Dextran Sulfate, BMDMs is Bone marrow-derived macrophages.
- (B) Lewis rat BMDMs were infected with indicated mutagenized parasites (MOI = 1) for 24 hours. Macrophage viability was measured via MTS assay. Data are displayed as the column ( $n = 1$ ).
- (C) Lewis rat BMDMs were infected with WT parasites or independent mutant strains isolated from the pool of mutagenized parasites (Mutant clone #1, #2 and #3) (MOI = 1) for 24 hours. Macrophage viability was measured via MTS assay. Data are displayed as the paired scatterplots (left,  $n \geq 8$  for WT,  $n = 11$  for mutant #1,  $n = 17$  for mutant #2,  $n = 8$  for mutant #3;  $***p < 0.001$ ,  $****p < 0.0001$ ; student's t-test). The right scatterplots are showing the cell viability difference between indicated mutant strains and WT parasites in each paired experiment. Horizontal bars represent the median cell viability difference.
- (D) Lewis rat BMDMs were infected with the strains used in (C) (MOI = 0.5) for 24 hours. Number of parasites per vacuole was quantified by microscopy. Between 100-120 vacuoles were counted per experiment. Data are

displayed as the average values ( $n = 4$ ; error bars, +SD; \*\*\*\* $p < 0.0001$ ; two-way ANOVA comparing mutants to WT).

(E) Western blot probing for IL-1 $\beta$  on concentrated (20x) supernatants of LPS-primed (100 ng/ml, 2 hours) Lewis rat BMDMs infected with the strains used in (C) (MOI = 1) for 24 hours. Image is representative of two experiments, pro-IL-1 $\beta$  is 37 kD, active IL-1 $\beta$  is 17 kD, aspecific band is represented by asterisk and indicates similar loading of samples.



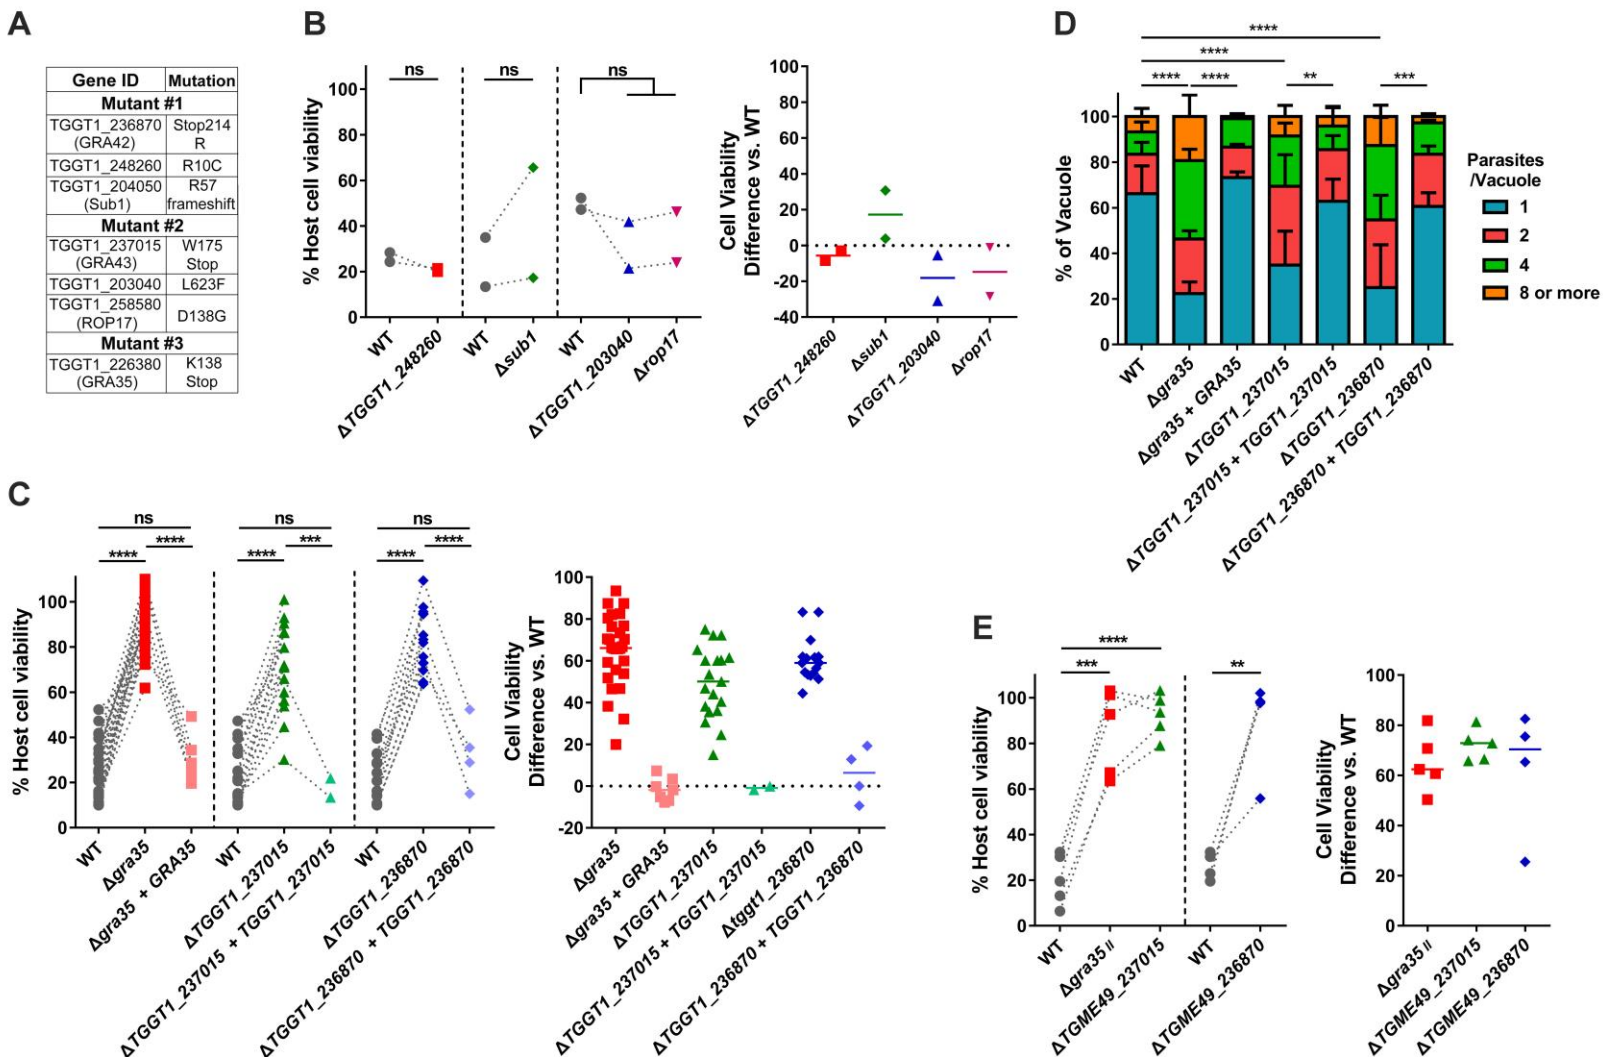

**Figure 4. Three genes are individually required to induce cell death in Lewis rat BMDMs.**

(A) List of genes containing non-synonymous polymorphisms that fulfill candidate gene criteria in isolated mutants.

(B) Lewis rat BMDMs were infected with WT parasites or the parasites in which *TGGT1\_248260*, *SUB1*, *TGGT1\_203040* or *ROP17* was knocked out ( $\Delta TGGT1_248260$ ,  $\Delta sub1$ ,  $\Delta TGGT1_203040$  or  $\Delta rop17$ ) (MOI = 1) for 24 hours. Macrophage viability was measured via MTS assay. Data are displayed on the left as the paired scatterplots (Left,  $n = 2$ ; ns, not significant; student's t-test). The right scatterplots are showing the cell viability difference between indicated knockout strains and WT parasites in each paired experiment. Horizontal bars represent the median cell viability difference.



(C) Cell viability as assessed by MTS assay of Lewis rat BMDMs infected with WT parasites, or parasites in which *GRA35*, *TGGT1\_237015* or *TGGT1\_236870* was knocked out ( $\Delta gra35$ ,  $\Delta TGGT1_237015$  or  $\Delta TGGT1_236870$ ) or knockout parasites complemented with WT alleles of *GRA35*, *TGGT1\_237015* or *TGGT1\_236870* ( $\Delta gra35 + GRA35$ ,  $\Delta TGGT1_237015 + TGGT1_237015$  or  $\Delta TGGT1_236870 + TGGT1_236870$ ) (MOI = 1) for 24 hours. Data are displayed on the left as the paired scatterplots (left,  $n \geq 16$  for WT,  $n = 28$  for  $\Delta gra35$ ,  $n = 7$  for  $\Delta gra35 + GRA35$ ,  $n = 19$  for  $\Delta TGGT1_237015$ ,  $n = 2$  for  $\Delta TGGT1_237015 + TGGT1_237015$ ,  $n = 16$  for  $\Delta TGGT1_236870$ ,  $n = 4$  for  $\Delta TGGT1_236870 + TGGT1_236870$ ; \*\*\* $p < 0.001$ , \*\*\*\* $p < 0.0001$ , ns, not significant; student's t-test). The right scatterplots are showing the cell viability difference between indicated strains with WT parasites in each paired experiment. Horizontal bars represent the median cell viability difference.

(D) Number of parasites per vacuole were measured in Lewis rat BMDMs infected with the strains used in (C) (MOI = 0.5) at 24 hours post-infection. Between 100-120 vacuoles were counted per experiment. Data are displayed as the average values ( $n = 5$  for WT and  $\Delta TGGT1_237015$ ,  $n = 4$  for  $\Delta gra35$ ,  $n = 3$  for  $\Delta TGGT1_236870$ ,  $n = 2$  for all the complementation strains; error bars, +SD; \*\* $p < 0.01$ , \*\*\* $p < 0.001$ , \*\*\*\* $p < 0.0001$ ; two-way ANOVA multiple comparisons).

(E) Lewis rat BMDMs were infected with type II WT parasites or type II parasites in which *GRA35*, *TGME49\_237015* or *TGME49\_236870* was knocked out ( $\Delta gra35_{II}$ ,  $\Delta TGME49_237015$  or  $\Delta TGME49_236870$ ) (MOI = 1) for 24 hours. Macrophage viability was measured via MTS assay. Data are displayed as the paired scatterplots (left,  $n \geq 4$  for WT,  $n = 5$  for  $\Delta gra35_{II}$  and  $\Delta TGME49_237015$ ,  $n = 4$  for  $\Delta TGME49_236870$ ; \*\* $p < 0.01$ , \*\*\* $p < 0.001$ , \*\*\*\* $p < 0.0001$ ; student's t-test). The right scatterplots are showing the cell viability difference between indicated knockout strains with WT parasites in each paired experiment. Horizontal bars represent the median cell viability difference.

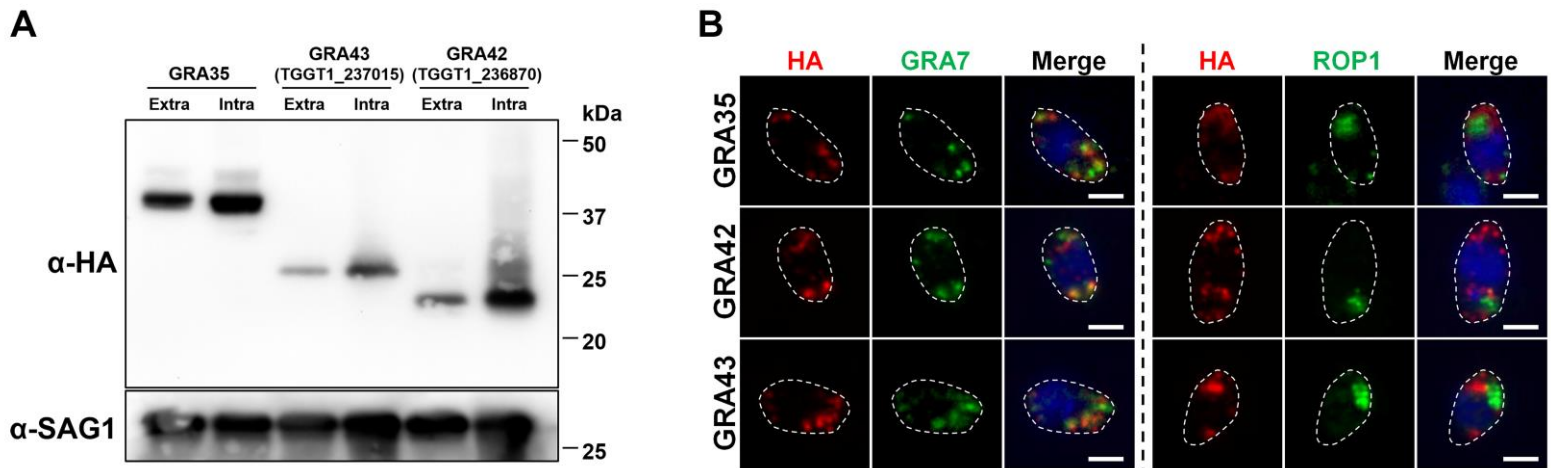

**Figure 5.** *TGGT1\_236870* and *TGGT1\_237015* encode for novel dense granule proteins, GRA42 and GRA43.

(A) Strains individually knocked out in each gene were generated using CRISPR/Cas9 and complemented with an HA-tagged WT version of gene. HFFs were infected with HA-expressing parasites for 24 hours. Extracellular parasites were removed and washed with PBS prior to lysing (“Extra”). Remaining infected cells were lysed (“Intra”). SAG-1 is used as parasite loading control. Predicted sizes: GRA35, 40.3 kD; GRA42, 29.3 kD; GRA43, 23.8 kD. Image is representative of two independent experiments.

(B) Extracellular parasites expressing HA-tagged GRA35, GRA42 or GRA43 were fixed, permeabilized, and subjected to Immunofluorescent assay with antibodies indicated. The images were taken at identical exposure times for each channel (scale bar = 2  $\mu$ m). Image is representative of two independent experiments.

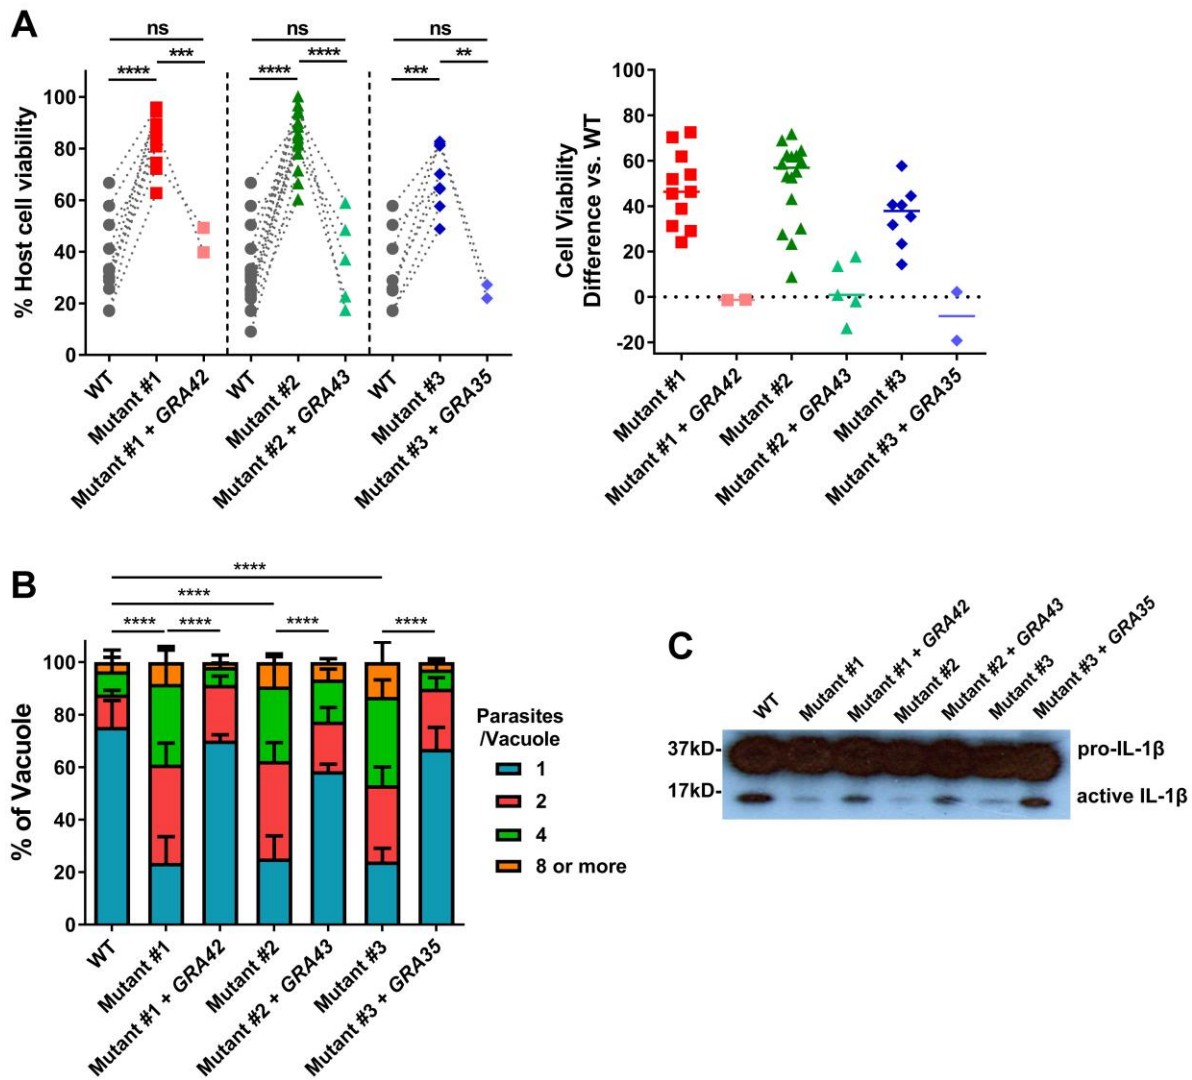

**(B)** Number of parasites per vacuole were measured in Lewis rat BMDMs infected with the strains used in **(A)** (MOI = 0.5) at 24 hours post-infection. Between 100-120 vacuoles were counted per experiment. Data are displayed as the average values ( $n = 4$  for WT and mutant #1, #2 and #3,  $n = 2$  for mutant #1 + *GRA42*, mutant #2 + *GRA43* and mutant #3 + *GRA35*; error bars, +SD; \*\*\*\* $p < 0.0001$ ; two-way ANOVA multiple comparisons).

**(C)** Western blot of IL-1 $\beta$  on concentrated supernatants (20x) BMDMs primed with LPS (100ng/ml, 2 hours) infected with the strains used in **(A)** (MOI =1, 24 hours). Image is representative of two independent experiments.

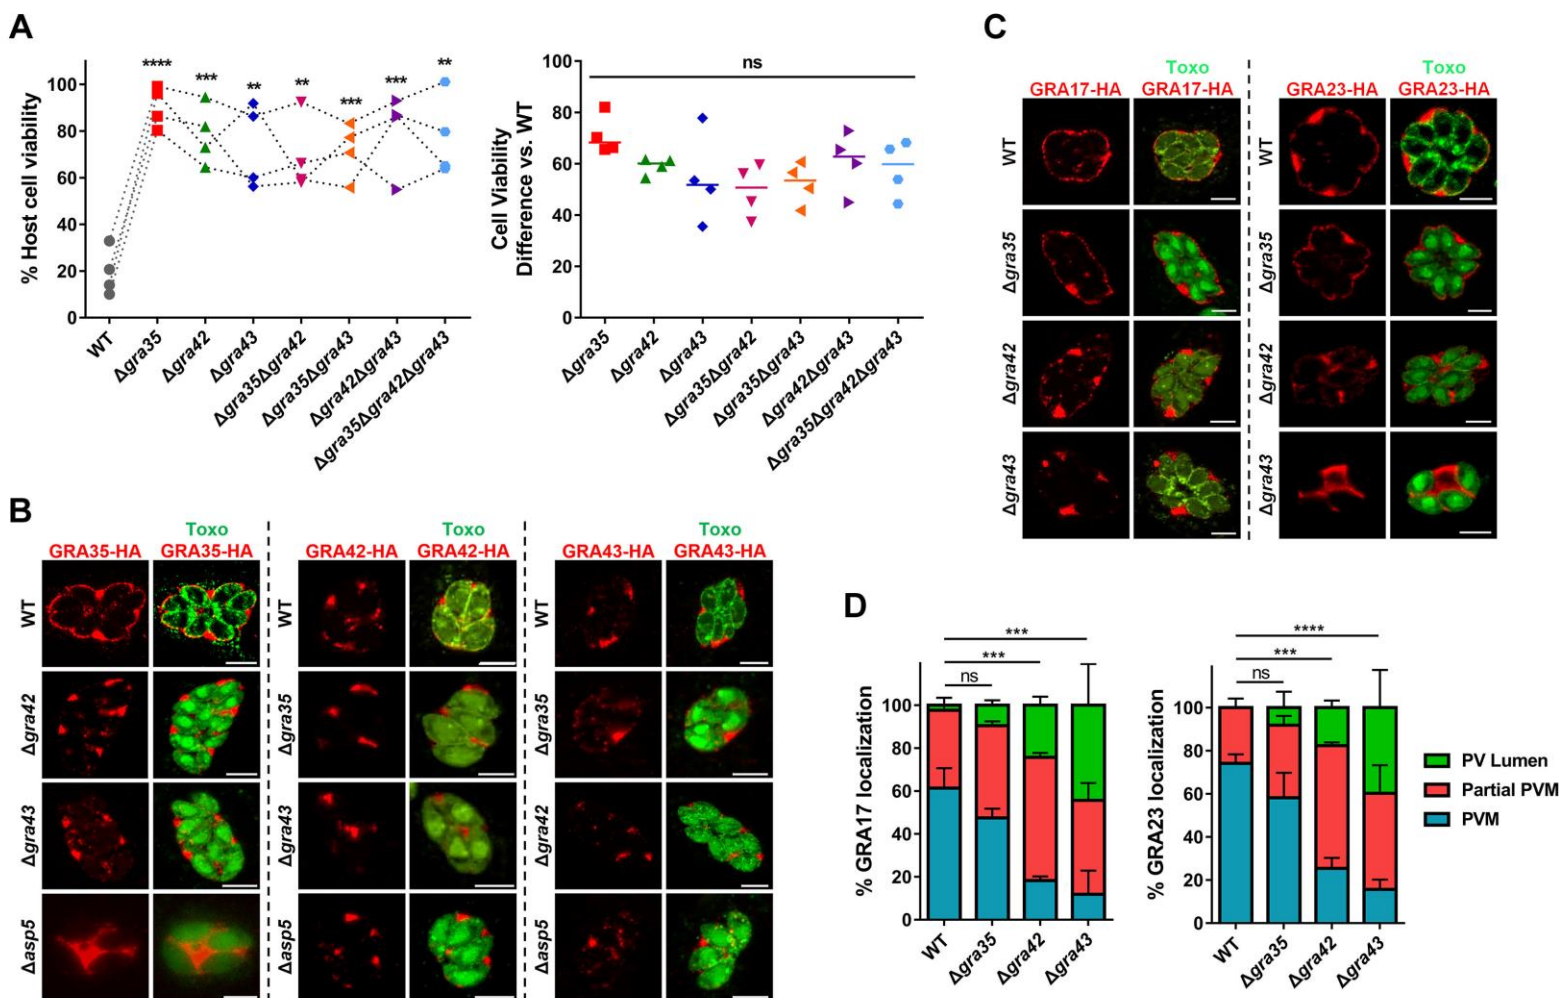

**Figure 7. GRA42 and GRA43 influence the localization of GRA35, as well as GRA17, to the PVM.**

(A) Lewis rat BMDMs were infected with WT parasites, or parasites in which *GRA35*, *GRA42* or *GRA43* was knocked out ( $\Delta gra35$ ,  $\Delta gra42$  or  $\Delta gra43$ ), or parasites containing a doubly knockout of *GRA35*, *GRA42* or *GRA43* ( $\Delta gra35\Delta gra42$ ,  $\Delta gra35\Delta gra43$  or  $\Delta gra42\Delta gra43$ ) or triple knockout parasites ( $\Delta gra35\Delta gra42\Delta gra43$ ) (MOI = 1) for 24 hours. Macrophage viability was measured via MTS assay. Data are displayed as the paired scatterplots (left,  $n = 4$ ; all knockout strains vs. WT, \*\* $p < 0.01$ , \*\*\* $p < 0.001$ , \*\*\*\* $p < 0.0001$ ; student's t-test). The right scatterplots are showing the cell viability difference between indicated strains and WT parasites in each paired experiment. Horizontal bars represent the median cell viability difference (ns, not significant; one-way ANOVA with Kruskal-Wallis test).

(B) HFFs were infected with WT parasites, parasites in which *GRA35*, *GRA42*, *GRA43* or *ASP5* was knocked out ( $\Delta gra35$ ,  $\Delta gra42$ ,  $\Delta gra43$  or  $\Delta asp5$ ) and that transiently expressed GRA35-HA (left), GRA42-HA (middle)

or GRA43-HA (right). The parasites were fixed and stained with antibodies against the HA epitope (red) and SAG1 (green). Transfected parasites were GFP positive. Images were taken at identical exposure times for each channel (scale bar = 5  $\mu$ m). Image is representative of two independent experiments.

(C) HFFs were infected with WT parasites or the parasites in which *GRA42* or *GRA43* was knocked out ( $\Delta$ *gra42* or  $\Delta$ *gra43*) and that transiently expressed GRA17-HA (left) or GRA23-HA (right), fixed and stained with antibodies against SAG1 (green) and the HA epitope (red). Transfected parasites were GFP positive. The images were taken at identical exposure times for each channel (scale bar = 5  $\mu$ m). Image is representative of two independent experiments.

(D) Localization of GRA17 or GRA23 (C) in at least 60 vacuoles containing 4 or more parasites was observed and scored as PVM localization, partial PVM localization or PV lumen localization. Data are displayed as the average values ( $n = 2$ ; error bars, +SD; \*\*\* $p < 0.001$ , \*\*\*\* $p < 0.0001$ ; two-way ANOVA comparing mutants to WT).

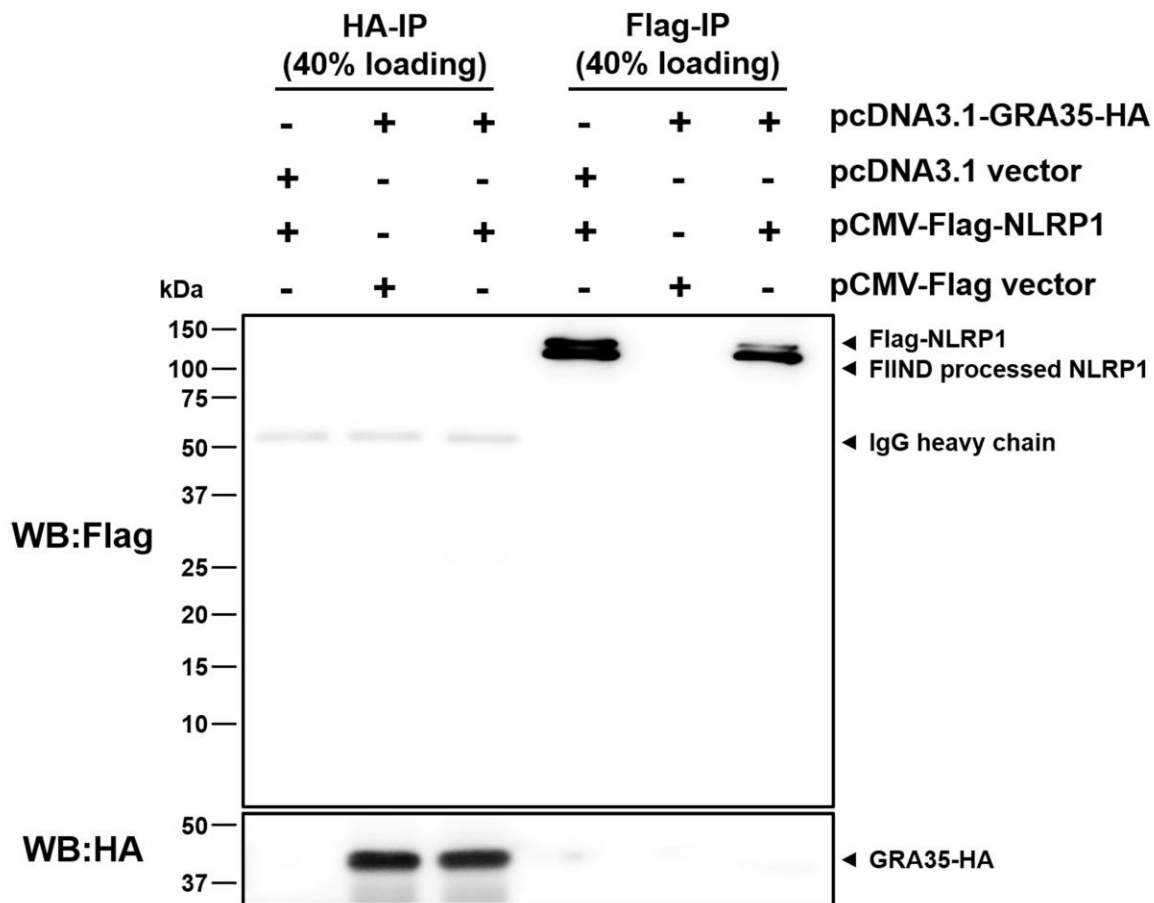

**Figure 8. Lewis rat NLRP1 does not interact with *Toxoplasma* GRA35 in co-transfected HEK293T cells.**

HEK293T cells were co-transfected with pcDNA3.1-GRA35-HA and pCMV-FLAG-NLRP1 (expressing Lewis rat variant of Nlrp1) at the ratio of 1:1. 30 hours after transfection, cells were lysed in IP-lysis buffer (50 mM Tris pH 7.4, 150 mM NaCl, 0.5% Triton X-100) containing 1 × protease inhibitor and 1 mM PMSF. The indicated portion of cell lysates was incubated with protein G magnetic beads pre-bound with rat anti-HA or mouse anti-FLAG antibody at 4 °C for 1 hour with rotation. After washing with IP-lysis buffer, proteins bound to the beads were solubilized in SDS-loading buffer by boiling for 5 minutes, and examined by Western blot analysis using indicated antibody. Image is representative of two independent experiments with similar outcomes.



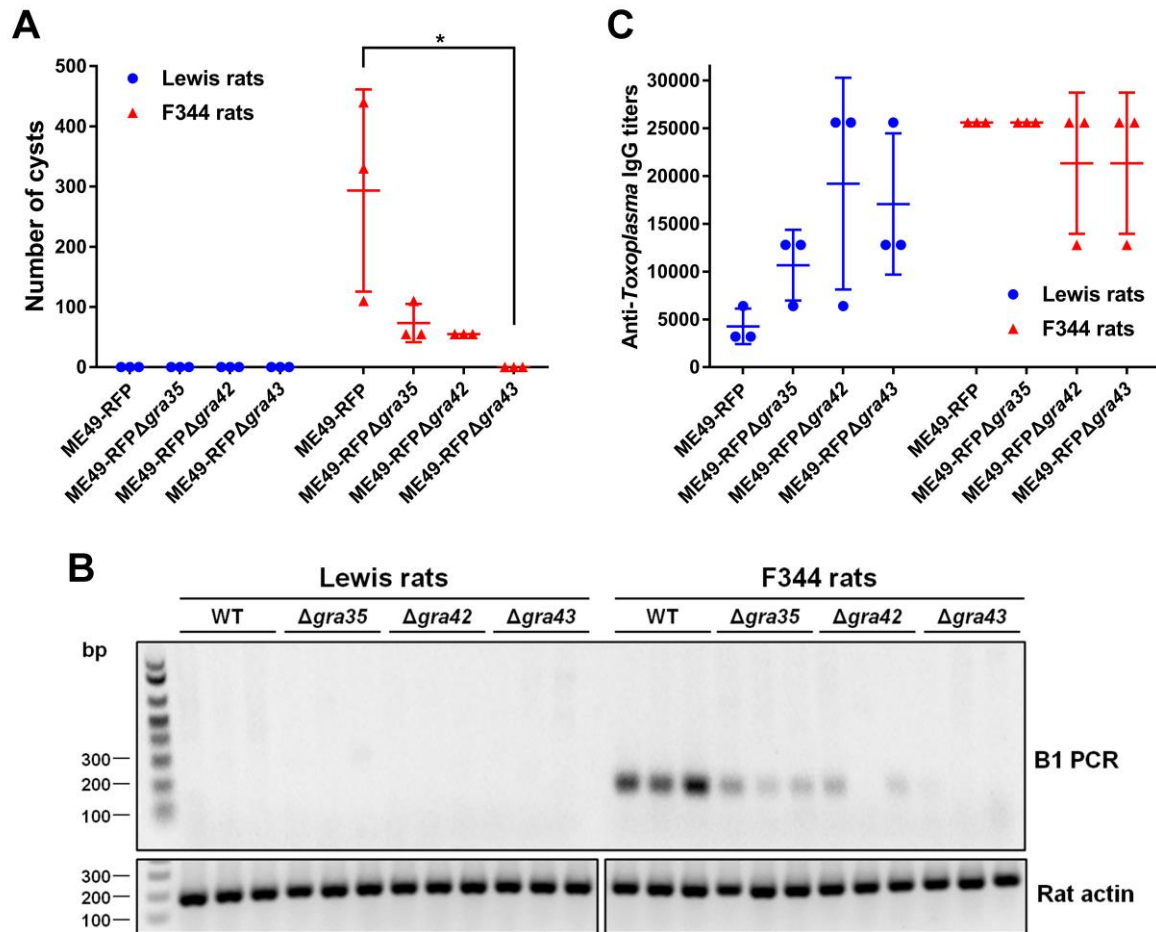

**Figure 9. Parasites lacking GRA35, GRA42 and GRA43 do not establish a chronic infection in Lewis rats.**

(A) Number of brain cysts from each rat was determined by FITC-DBA staining at 60 days post-infection. Each plot represents number of brain cysts of individual rat ( $n = 3$ ;  $*p < 0.05$ ; one-way ANOVA with Kruskal-Wallis test).

(B) The presence of *Toxoplasma* genomic DNA in the brain of infected rats was detected by diagnostic PCR targeting the multi-copy *B1* gene. As an internal control, rat actin was used to check the quality of isolated DNA. Image is representative of two independent experiments.

(C) The rat serum was obtained at 60 days post-infection. The anti-*Toxoplasma* IgG titers were quantified by ELISA. Titers were defined as the dilution which gave an OD<sub>405</sub> reading at least two-fold higher than the mean background in uninfected rat serum. Results are presented as mean values  $\pm$  SD obtained from individual infected rats ( $n = 3$ ).
